# Supplementary material for: Does high-carbohydrate intake lead to increased risk of obesity? A systematic review and meta-analysis
Source: PubMed Central journal article supplement — BMJ Open. 2018 Feb 8;8(2):e018449. doi: 10.1136/bmjopen-2017-018449 (PMC5829813; doi:10.1136/bmjopen-2017-018449), 2018-02-08
Supplement: bmjopen-2017-018449.draft_revisions.pdf [file bmjopen-2017-018449.draft_revisions.pdf]

# BMJ Open

BMJ Open is committed to open peer review. As part of this commitment we make the peer review history of every article we publish publicly available.

When an article is published we post the peer reviewers' comments and the authors' responses online. We also post the versions of the paper that were used during peer review. These are the versions that the peer review comments apply to.

The versions of the paper that follow are the versions that were submitted during the peer review process. They are not the versions of record or the final published versions. They should not be cited or distributed as the published version of this manuscript.

BMJ Open is an open access journal and the full, final, typeset and author-corrected version of record of the manuscript is available on our site with no access controls, subscription charges or pay-per-view fees (<http://bmjopen.bmj.com>).

If you have any questions on BMJ Open's open peer review process please email [editorial.bmjopen@bmj.com](mailto:editorial.bmjopen@bmj.com)

# BMJ Open

## Does high carbohydrate intake lead to increased risk of obesity? A systematic review and meta-analysis

|                                 |                                                                                                                                                                                                                                                                                                                                 |
|---------------------------------|---------------------------------------------------------------------------------------------------------------------------------------------------------------------------------------------------------------------------------------------------------------------------------------------------------------------------------|
| Journal:                        | <i>BMJ Open</i>                                                                                                                                                                                                                                                                                                                 |
| Manuscript ID                   | bmjopen-2017-018449                                                                                                                                                                                                                                                                                                             |
| Article Type:                   | Research                                                                                                                                                                                                                                                                                                                        |
| Date Submitted by the Author:   | 30-Jun-2017                                                                                                                                                                                                                                                                                                                     |
| Complete List of Authors:       | Sartorius, Kurt; University of KwaZulu-Natal, Public Health Medicine, School of Nursing and Public Health<br>Sartorius, Benn; UKZN, School of Nursing and Public health<br>Madiba, Thandinkosi; University of KwaZulu-Natal, School of Clinical Medicine<br>Stefan, Cristina; African Medical Research and Innovation Institute |
| <b>Primary Subject Heading</b>: | Public health                                                                                                                                                                                                                                                                                                                   |
| Secondary Subject Heading:      | Epidemiology                                                                                                                                                                                                                                                                                                                    |
| Keywords:                       | high carbohydrate intake, obesity, observational                                                                                                                                                                                                                                                                                |
|                                 |                                                                                                                                                                                                                                                                                                                                 |

SCHOLARONE™  
Manuscripts

1  
2  
3  
4  
5  
6  
7  
8  
9  
10  
11  
12  
13  
14  
15  
16  
17  
18  
19  
20  
21  
22  
23  
24  
25  
26  
27  
28  
29  
30  
31  
32  
33  
34  
35  
36  
37  
38  
39  
40  
41  
42  
43  
44  
45  
46  
47  
48  
49  
50  
51  
52  
53  
54  
55  
56  
57  
58  
59  
601 **Title Page**2 **Does high carbohydrate intake lead to increased risk of obesity? A systematic review and meta-**  
3 **analysis**4 Sartorius K\*<sup>1-3</sup>, Sartorius B\*<sup>1,2</sup>, Madiba TE<sup>2,4</sup>, Stefan C<sup>5</sup>

- 5 1. Discipline of Public Health Medicine, School of Nursing and Public Health, University of
- 6 KwaZulu-Natal, Durban, South Africa
- 7 2. University of KwaZulu-Natal Gastrointestinal Cancer Research Centre (GICRC)
- 8 3. Faculty of Commerce, University of the Witwatersrand, Johannesburg, South Africa
- 9 4. School of Clinical Medicine, University of KwaZulu-Natal, Durban, South Africa
- 10 5. African Medical Research and Innovation Institute, Cape Town, South Africa

11 \* Joint first authors

12 Correspondence to both:

13 Professor Kurt Sartorius; email: Kurt.Sartorius@wits.ac.za. Tel.: +27 (0) 11-717-8056; fax: +27 (0) 11-  
14 717-8223. Postal address: University of the Witwatersrand, Private Bag 3, 2050, Johannesburg,  
15 South Africa.16 Professor Benn Sartorius; email: Sartorius@ukzn.ac.za; Tel: +27 (0) 31-260-4459; fax: +27 (0) 31-260-  
17 4211; Postal address: Discipline of Public Health Medicine, 2nd floor George Campbell Building,  
18 Howard College Campus, University of KwaZulu-Natal, Durban, 4001, South Africa.

19

20

21

22

23

24

25

26

27

28

29

30

31

32

33

34

## 35 Abstract

36 Objectives: The present study aimed to test the association between high versus low carbohydrate  
37 diets and obesity, and secondly, to test the link between total carbohydrate intake (as a percentage  
38 of total energy intake) and obesity.

39 Design, setting and participants: systematic review and meta-analysis. We sought literature  
40 databases for observational studies from the general population across the globe.

41 Primary outcome measures: obesity.

42 Primary exposure measures: high carbohydrate intake.

43 Results: The study identified 22 articles that fulfilled the inclusion and exclusion criteria and  
44 quantified an association between carbohydrate intake and obesity. The first pooled strata (high  
45 carbohydrate versus a low carbohydrate intake) suggested a weak increased risk of obesity. The  
46 second pooled strata (increasing percentage of total carbohydrate intake in daily diet) showed a  
47 weak decreased risk of obesity. Both these pooled strata estimates were however not statistically  
48 significant.

49 Conclusions: On the basis of the current study, it cannot be concluded that a high carbohydrate diet  
50 or increased percentage of total energy intake in the form of carbohydrates increases the odds of  
51 obesity. A central limitation of the study was the non-standard classification of dietary intake across  
52 the studies, as well as confounders like total energy intake, activity levels, age and gender. Further  
53 studies are needed that specifically classify refined versus unrefined carbohydrate intake, as well as  
54 studies that investigate the relationship between high fat, high unrefined carbohydrate-sugar diets.

55 **Registration number** PROSPERO CRD42015023257

56 **Keywords:** high carbohydrate intake, obesity, analytical, observational

### 57 Strengths and limitations:

- 58 • Systematic review of observational studies across LMIC and HIC countries and first to  
59 explore this angle as far as we are aware.
- 60 • The scarcity of studies and/or data that either measured obesity risk versus total  
61 carbohydrate intake or alternatively measured obesity risk on the basis of a high versus low  
62 carbohydrate intake is a limitation.
- 63 • The non- standardized instruments for total dietary and total carbohydrate intake across  
64 studies is a further limitation.
- 65 • The heterogeneity in the classification of dietary carbohydrate and variation in staple  
66 carbohydrates is especially emphasized across different countries, developed versus  
67 developing scenarios and socio-economic changes over the last three decades.
- 68 • Studies with high heterogeneity and varying design and measurement quality may limit the  
69 quality of evidence from this study.

## 70 Introduction

71 Global estimates in 2005 indicated 937 million people were overweight and 328 million were obese  
72 [1]. In 2010, an estimated 3.4 million deaths, 3.9% of years of life lost, and 3.8% of disability-adjusted  
73 life-years worldwide, were attributed to overweight and obesity [2]. The rate of change of obesity in  
74 this global study indicated significant increases in both men and women. In men the proportion of  
75 adults with a body mass index (BMI) of 25 or greater increased from 28.8% in 1980 to 36.9% in 2013  
76 and for women increased from 29.8% to 38.0%. These increases occurred in both developed and  
77 developing countries. In addition, significant increases in obesity were also recorded among children

1  
2  
3 78 and adolescents in developed countries that indicated 23.8% of boys were either overweight or  
4 79 obese and 22.6% of girls. Overweight and obesity is also increasing in children and adolescents in  
5 80 developing countries and has risen from 8.1% in 1980 to 12.9% in 2013 for boys and from 8.4% to  
6 81 13.4% for girls [2]. The relationship between dietary intake, and specifically the role of  
7 82 carbohydrates and obesity at a population level, is also unclear.

8  
9 83 The etiology of obesity increasingly reflects excessive calorie intake matched with higher levels of  
10 84 sedentary activity that occur in the face of a worldwide urban migration. In this scenario, traditional  
11 85 diets are often replaced with low cost energy dense foodstuffs produced by the industrialized food  
12 86 [3-5]. Body weight is ultimately determined by the interaction of genetic, environmental and  
13 87 psychosocial factors acting through the physiological mediators of energy intake and energy  
14 88 expenditure [6-8]. Nevertheless, carbohydrates have been linked to disease for many decades [9]  
15 89 and more recently with an epidemic of type 2 diabetes [10]. Although there is no consistent  
16 90 evidence that carbohydrates have driven the current levels of global obesity, carbohydrates form a  
17 91 major component of most national diets [11].

19 92 The objective of this systematic review/meta-analysis is to investigate the relationship between  
20 93 carbohydrate intake and obesity. More specifically, the first question is whether a high versus low  
21 94 carbohydrate diet is a risk factor for obesity and secondly, whether total carbohydrate intake is a risk  
22 95 factor related to obesity?

24 96

## 25 97 **Materials and Methods**

26 98

### 27 99 *Registration of protocol with PROSPERO*

28 100

29 101 In accordance with the guidelines, the systematic review protocol was registered with the  
30 102 International Prospective Register of Systematic Reviews (PROSPERO) on 8 June 2015 (registration  
31 103 number CRD42015023257). The protocol was also formally peer reviewed and published in BMJ  
32 104 Open. Carbohydrate intake, obesity, metabolic syndrome and cancer risk? A two-part systematic  
33 105 review and meta-analysis protocol to estimate attributability [12].

34 106

35 107 This systematic review was aligned to the Preferred Reporting Items for Systematic Reviews and  
36 108 Meta-Analyses (PRISMA) guidelines to ensure all necessary steps have been followed (see Appendix  
37 109 1).

38 110

### 39 111 *Data sources and searches*

40 112

41 113 We used the MEDLINE online database, EMBASE, Web of Science and the Cochrane Database of  
42 114 Systematic Reviews to identify selected studies that evaluated the determinants of obesity including  
43 115 the effect of high versus low carbohydrate diets, as well as the percentage of carbohydrates in total  
44 116 dietary intake. Studies published between 1 January 1980 and 31 December 2016 were included. In  
45 117 addition, web based studies that were unpublished (e.g. reports or unpublished theses) were  
46 118 evaluated using research engines like Google Scholar. The following keywords or medical subject  
47 119 headings on MEDLINE were used: ("Diet or low-carbohydrate diet or low sugar diet or diet,  
48 120 carbohydrate restricted or complex carbohydrates or refined carbohydrates or sugar or sugar  
49 121 sweetened beverages or fat or dietary fibre or protein intake or total carbohydrate intake or total  
50 122 calorie intake) AND ("body mass index" or "BMI" or "waist circumference" or "obesity" or "blood  
51 123 glucose" or "fat mass" or "free fat mass").

52 124

### 53 125 *Study screening and selection*

54 126

1  
2  
3 127 We included studies examining healthy adults (18 years or older). We also included studies on  
4 128 people who were overweight or obese, but otherwise excluded (after evaluation) studies of  
5 129 populations restricted to specific diseases, conditions, or metabolic disorders. Of specific interest  
6 130 were general population studies that investigated the prevalence of obesity in relation to detailed  
7 131 dietary intake [11]. Studies quantifying dietary intake in terms of total carbohydrate intake as a  
8 132 percentage of total energy, and high vs low carbohydrate intake in relation to the odds of obesity,  
9 133 were included.

10 134  
11 135 Two authors (KS, BS) independently screened study titles and abstracts for potential eligibility.  
12 136 Screening questions were developed and pilot-tested with a subset of records before  
13 137 implementation. Full texts of potentially eligible studies were retrieved and the two authors  
14 138 independently applied inclusion/exclusion criteria to identify appropriate studies in this review.  
15 139 Disagreement was assessed using the Kappa statistic and was resolved through discussion and a  
16 140 third arbitrator. We developed a summary table with characteristics of included studies. Reasons for  
17 141 exclusion of studies were documented.

#### 18 142 19 143 *Appraisal of the quality of included studies*

20 144  
21 145 Three reviewers (KS, CS, TM) were content experts and one reviewer was an experienced  
22 146 biostatistician and epidemiologist (BS). The contents experts only assessed potential publications  
23 147 with respect to the appropriateness of the research questions being tested. The biostatistician only  
24 148 evaluated the appropriateness of the individual study methods employed to ensure that an odds  
25 149 ratio was developed to assess the relationship between carbohydrate intake and the risk of obesity.

26 150  
27 151 (BS, KS) also evaluated studies for quality and bias using an adapted version of the Risk of Bias Tool  
28 152 for Prevalence Studies developed by Hoy et al [13]. Assessment of the risk of selection and attrition  
29 153 bias used the Cochrane guidelines available in Review Manager V.5.3  
30 154 (<http://tech.cochrane.org/revman>). Furthermore, the reporting quality of each study was assessed  
31 155 using the STROBE checklist [14].  
32 156

#### 33 157 **Inclusion and exclusion criteria**

34 158  
35 159 We included cross-sectional, case-control or cohort studies assessing risk factors for obesity  
36 160 including dietary carbohydrate intake (carbohydrate % intake of total energy and high vs low  
37 161 carbohydrate intake). Case series or case reports without controls were excluded. We excluded  
38 162 studies assessing restricted dietary interventions as our primary objective was to assess reported  
39 163 carbohydrate intake and measured obesity in normal diet. Studies not performed in human  
40 164 participants were excluded, as were studies lacking primary data and/or explicit method description.  
41 165 Studies with major ethical issues were also excluded. The classification of obesity was based on BMI  
42 166 or visceral obesity (waist circumference). We considered both published and unpublished studies.  
43 167 No language restriction was applied.

#### 44 168 45 169 *Data extraction and management*

46 170  
47 171 Feedback was solicited from the research team regarding the draft list of data variables for  
48 172 extraction. Data extraction forms were developed and pilot-tested in Distiller SR. One person (BS)  
49 173 extracted all the information. A second person (KS) verified 20% of studies for general characteristics  
50 174 information and 100% of studies regarding outcome data. Disagreements were resolved by  
51 175 consensus or by a third team member. Information on the descriptive and quantitative  
52 176 characteristics of studies included the following: Publication details (e.g. year of publication,  
53 177 language, publication status) , Characteristics of study (e.g. study design, methods, country, setting,

178 sample size, number of centres [if applicable], duration of follow-up, source of funding),  
179 Characteristics of population (e.g. age, gender, ethnicity, co-interventions, information regarding  
180 respondent bias or representativeness of the included population), Details about the exposure (e.g.  
181 type of diet , percentage of total calories obtained from carbohydrate consumption, method of  
182 assessing carbohydrate consumption; type of educational or other interventions and description,  
183 type of professional delivering intervention). Following extraction of data we noted the need to  
184 stratify the studies in two exposure strata, namely:

- 185 • High vs low carbohydrate intake;
- 186 • Total Carbohydrate percentage intake of total energy.

### 187

### 188 **Data synthesis/analysis**

189

190 Data were analyzed using a random-effect meta-analysis model and incorporating a restricted  
191 maximum-likelihood (REML) variance estimator. Effect measures were presented as odds ratios (OR)  
192 with 95% confidence intervals (CI). All analyses were performed using R software version 3.2.0 or  
193 later (R Core Team (2015). R: A language and environment for statistical computing. R Foundation  
194 for Statistical Computing, Vienna, Austria.URL <http://www.R-project.org/>). The following packages  
195 were of R software were utilized for the meta-analyses: 'meta' version 4.2-0 (General Package for  
196 Meta-Analysis) and 'metafor' version 1.9-7 (A comprehensive collection of functions for conducting  
197 meta-analyses in). Recent GRADE guidelines were utilized for preparing summary tables for the  
198 primary outcomes [15 16].

### 199

### 200 *Heterogeneity*

201 We assessed statistical heterogeneity in our meta-analysis using the  $I^2$  statistic. If the  $I^2$  was greater  
202 than 50% we regarded this as substantial heterogeneity.

### 203 *Publication bias*

204 We investigated publication bias using funnel plots and Egger's test [17] . In cases where asymmetry  
205 was present based on visual assessment, we performed exploratory analyses to investigate and  
206 adjust this using trim and/or fill analysis [18].

### 207 *Sensitivity analysis*

208 To further identify potential sources of heterogeneity, we performed the following subgroup  
209 analysis by type of carbohydrate intake i.e. high vs low classification compared to carbohydrate %  
210 intake of total energy.

### 211 **Results**

212

213 Of 2665 retrieved citations, 200 articles were selected following abstract screening, following which  
214 22 articles met the inclusion criteria. Figure 1 shows our search and selection process. There was  
215 high agreement between articles selected based on abstract screening between the two reviewers  
216 (96.12% agreement between two independent raters, \*Kappa statistic = 0.633,  $p < 0.001$ ). Figure 2  
217 shows that all but one of the eligible and selected articles were published since 2000. There were a  
218 few large studies in early 2000's, a decrease in sample size of studies in mid-2000 period and then  
219 increase in sample size from 2009.

220  
221  
222

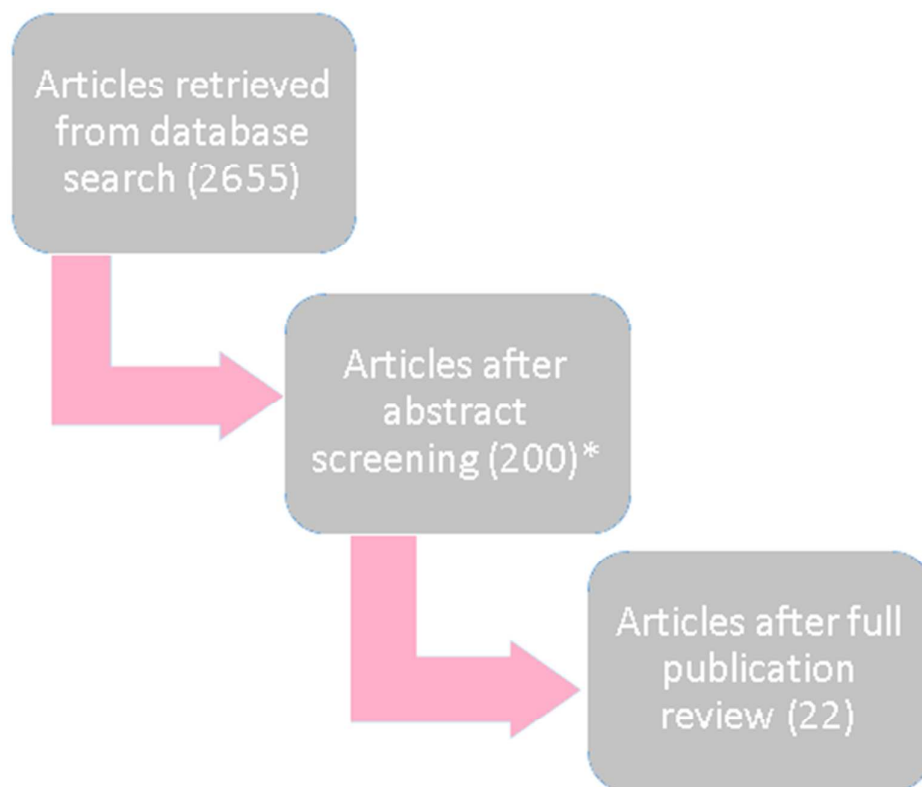

223 Figure 1: PRISMA flow diagram for study selection following search and selection process  
 224  
 225

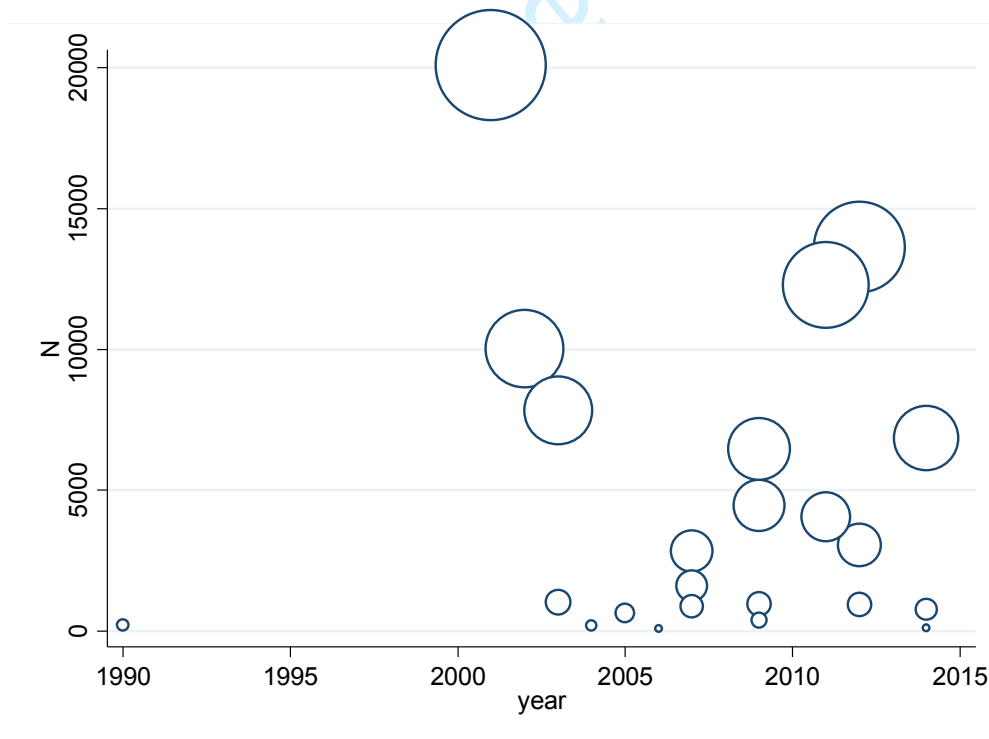

226 Figure 2: Study sample size by year (combined strata)  
 227

228  
 229 The odds ratios of becoming obese based on carbohydrate intake were tested using two strata of  
 230 data (Table 1). Stratum one was based on high vs low classification of carbohydrate intake while



231 stratum two assessed carbohydrate % intake of total energy. In stratum one, 13 adult based studies  
 232 showed a non-significant pooled odds ratio of 1.043 (95%CI: 0.933-1.154) indicating a slight positive  
 233 relationship between high carbohydrate intake and obesity (Figure 3). Within this stratum, eight  
 234 studies showed an increased risk of obesity and five studies a reduced risk of obesity. Of the eight  
 235 studies showing an increased risk, four Korean based studies, making up 51.92% of the total pooled  
 236 sample, showed an increased risk of obesity related to high carbohydrate diets (id 420, 2616), a high  
 237 carbohydrate rice based diet (1206) and a high carbohydrate refined grains based diet (2226). Two  
 238 studies in the South Western United states showed contrasting odds in the risk of obesity across two  
 239 ethnic groups. In these two studies, Hispanic females indicated a reduced risk of obesity in relation  
 240 to a high carbohydrate diet, whereas white females indicated an increased risk of obesity. The  
 241 highest odds of increased obesity were indicated in a Sri Lankan study involving high levels of  
 242 inactivity, as well as a high carbohydrate intake.

243  
 244 In Stratum two, 11 adult based studies investigated the relationship between total calorie intake of  
 245 carbohydrates and the odds of obesity. Six studies showed a reduced risk and five an increased risk  
 246 (Figure 4), once more with a non-significant pooled odds ratio of 0.984 (95% CI: 0.926-1.042), in  
 247 opposite direction to results observed for stratum one (Table 1). One study, involving multiple  
 248 surveys of a multi-ethnic Hawaiian population (id 1480), making up 66% of the total pooled sample,  
 249 indicated a 7.7% increased risk of obesity in response to a higher percentage of total carbohydrate  
 250 intake. Conversely, the three US based National Health and Nutrition Examination Surveys  
 251 (NHANES), making up 15.71 % of the total pooled sample indicated no increased risk (id 130, 130) or  
 252 a reduced risk of obesity (id 2591).

253  
 254 The results of the meta-analyses by strata both suggested prominent heterogeneity across individual  
 255 studies (Stratum one  $I^2 = 85.4\%$ ; Stratum two  $I^2 = 86.1\%$ ). Possible reasons for this are discussed  
 256 under the limitations section.

257

**Table 1: Odds of developing obesity as a result of high carbohydrate diet**

| Strata | Id   | Title                                                                                                                                              | Exposure measured                                          | Odds ratio | Lower bound | Upper bound | Sample size |
|--------|------|----------------------------------------------------------------------------------------------------------------------------------------------------|------------------------------------------------------------|------------|-------------|-------------|-------------|
| 1      | 27   | Association of macronutrient intake patterns and overweight patterns in a population-based random sample of adult males in France.                 | Quartile 4 vs 1 (CHD per day)                              | 0.50       | 0.25        | 0.97        | 966         |
| 1      | 279  | A comparison of low-carbohydrate vs. high-carbohydrate diets: energy restriction, nutrient quality and correlation to body mass index. US adults   | Above 55% calories (High) vs 0% to 30% calories (Very low) | 0.72       | 0.62        | 0.84        | 10014       |
| 1      | 420  | Characteristics of diet patterns in metabolically obese, normal weight adults (Korean National Health and Nutrition Examination Survey III, 2005). | Quartile 4 vs 1 (CHD per day)                              | 1.66       | 1.13        | 2.43        | 3050        |
| 1      | 1080 | Diet and overweight and obesity in populations of African origin: Cameroon, Jamaica and the UK.                                                    | Tertiale 3 vs 1 for CHD intake                             | 0.31       | 0.06        | 1.50        | 2842        |
| 1      | 1206 | A rice-based traditional dietary pattern is associated with obesity in Korean adults.                                                              | Tertiale 3 vs 1 for white Rice and Kimchi                  | 1.19       | 1.09        | 1.33        | 13618       |

|   |      |                                                                                                                                                   |                                                                                    |      |      |       |       |
|---|------|---------------------------------------------------------------------------------------------------------------------------------------------------|------------------------------------------------------------------------------------|------|------|-------|-------|
| 1 | 1364 | Dietary patterns of Hispanic elders are associated with acculturation and obesity.                                                                | Rice dietary pattern                                                               | 1.05 | 1.02 | 1.09  | 1030  |
| 1 | 1526 | [Overweight and obesity in Shanghai adults and their associations with dietary patterns].                                                         | Staple food and vegetables higher obesity (Q4 vs Q1 higher proportion carb intake) | 1.28 | 1.00 | 1.64  | 768   |
| 1 | 1532 | Carbohydrate intake and overweight and obesity among healthy Canadian adults.                                                                     | Quartiles of carbohydrate intake compared to the lowest intake category (Q4 vs Q1) | 0.6  | 0.42 | 0.85  | 4451  |
| 1 | 1634 | Diet composition and risk of overweight and obesity in women living in the southwestern United States.                                            | High vs Low: Carbohydrate (% energy) - Non-Hispanic White                          | 1.48 | 0.83 | 2.63  | 1599  |
| 1 | 1634 | Diet composition and risk of overweight and obesity in women living in the southwestern United States.                                            | High vs Low: Carbohydrate (% energy) - Hispanic                                    | 0.57 | 0.21 | 1.54  | 871   |
| 1 | 1923 | High carbohydrate diet and physical inactivity associated with central obesity among premenopausal housewives in Sri Lanka.                       | Percent of energy from carbohydrate: high (>=70%)                                  | 6.26 | 2.11 | 18.57 | 100   |
| 1 | 2226 | Carbohydrate intake and refined-grain consumption are associated with metabolic syndrome in the Korean adult population.                          | Energy from CHD (Q5 vs Q1)                                                         | 1.46 | 1.07 | 2.01  | 6845  |
| 1 | 2616 | Association between dietary carbohydrate, glycaemic index, glycaemic load, and the prevalence of obesity in Korean men and women.                 | Q4 vs Q1 carbohydrate intake                                                       | 1.12 | 0.60 | 2.21  | 933   |
| 2 | 130  | Trends in carbohydrate, fat, and protein intakes and association with energy intake in normal-weight, overweight, and obese US adults: 1971-2006. | Carbohydrate intake (% of energy)- NHANES I                                        | 0.99 | 0.95 | 1.04  | 12276 |
| 2 | 130  | Trends in carbohydrate, fat, and protein intakes and association with energy intake in normal-weight, overweight, and obese US adults: 1971-2006. | Carbohydrate intake (% of energy)- NHANES 2005/2006                                | 0.99 | 0.95 | 1.03  | 4057  |
| 2 | 782  | Adiposity and dietary intake in cardiovascular risk in an obese population from a Mediterranean area.                                             | Carbohydrate intake (% of energy)                                                  | 0.71 | 0.25 | 2.07  | 193   |
| 2 | 930  | Are school employees role models of healthful eating? Dietary intake results from the ACTION worksite wellness trial, US adults                   | Carbohydrate intake (% of energy)                                                  | 0.83 | 0.54 | 1.29  | 373   |
| 2 | 1297 | Diet composition and obesity among Canadian adults.                                                                                               | Carbohydrate intake (% of energy)                                                  | 1.02 | 0.98 | 1.07  | 6454  |

|   |      |                                                                                                                             |                                                              |       |      |      |        |
|---|------|-----------------------------------------------------------------------------------------------------------------------------|--------------------------------------------------------------|-------|------|------|--------|
| 2 | 1410 | Diet variety based on macronutrient intake and its relationship with body mass index. US adults                             | Carbohydrate DVS                                             | 1.42  | 0.85 | 2.36 | 74     |
| 2 | 1426 | Association between dietary carbohydrates and body weight. US adults                                                        | Daily dietary glycaemic index vs BMI continuous              | 2.117 | 1.23 | 3.67 | 641    |
| 2 | 1480 | Dietary determinants of overweight and obesity in a multi-ethnic adult Hawaiian population.                                 | Carbohydrate (1 g/100 kcal)                                  | 1.08  | 1.04 | 1.12 | 101699 |
| 2 | 1557 | Diet composition, energy intake, and exercise in relation to body fat in men and women. US adults                           | Lean vs obese subjects and energy derived from carbohydrates | 0.87  | 0.67 | 1.13 | 216    |
| 2 | 1587 | Diet culture and obesity in northern Africa.                                                                                | Carbohydrate mean daily energy intake                        | 1.07  | 1.05 | 1.09 | 20080  |
| 2 | 2591 | Carbohydrate intake is associated with diet quality and risk factors for cardiovascular disease in U.S. adults: NHANES III. | Carbohydrate intakes (% of energy)                           | 0.39  | 0.24 | 0.64 | 7828   |

258  
259

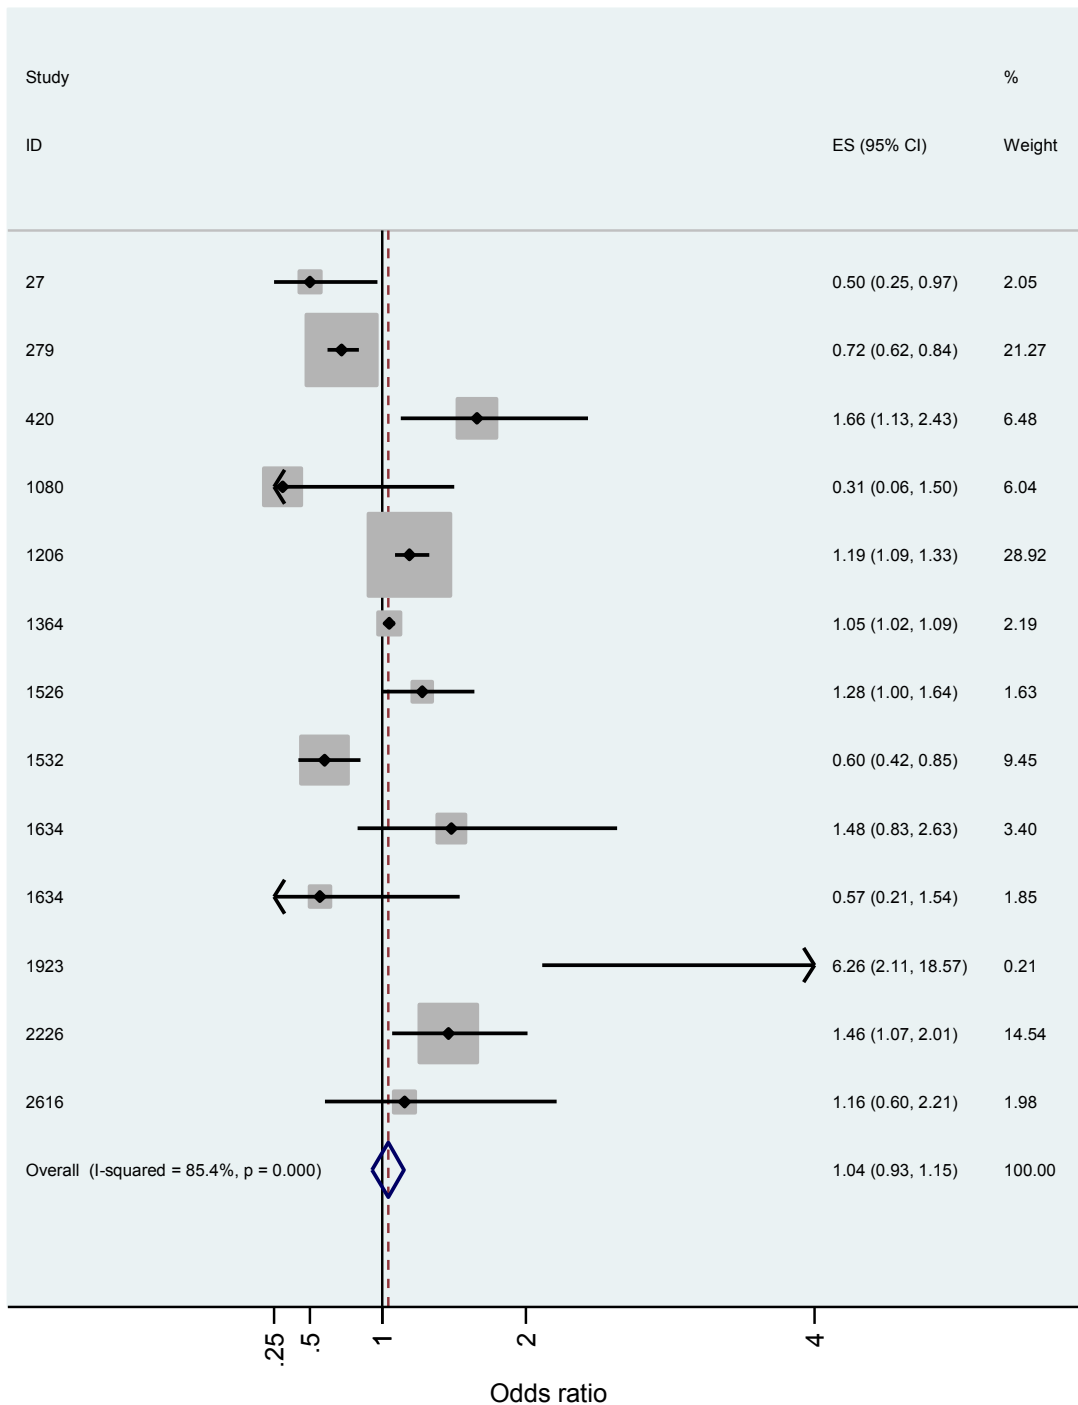

Figure 3: Forest plot of association between high vs low carbohydrate intake and obesity

260  
261  
262  
263  
264

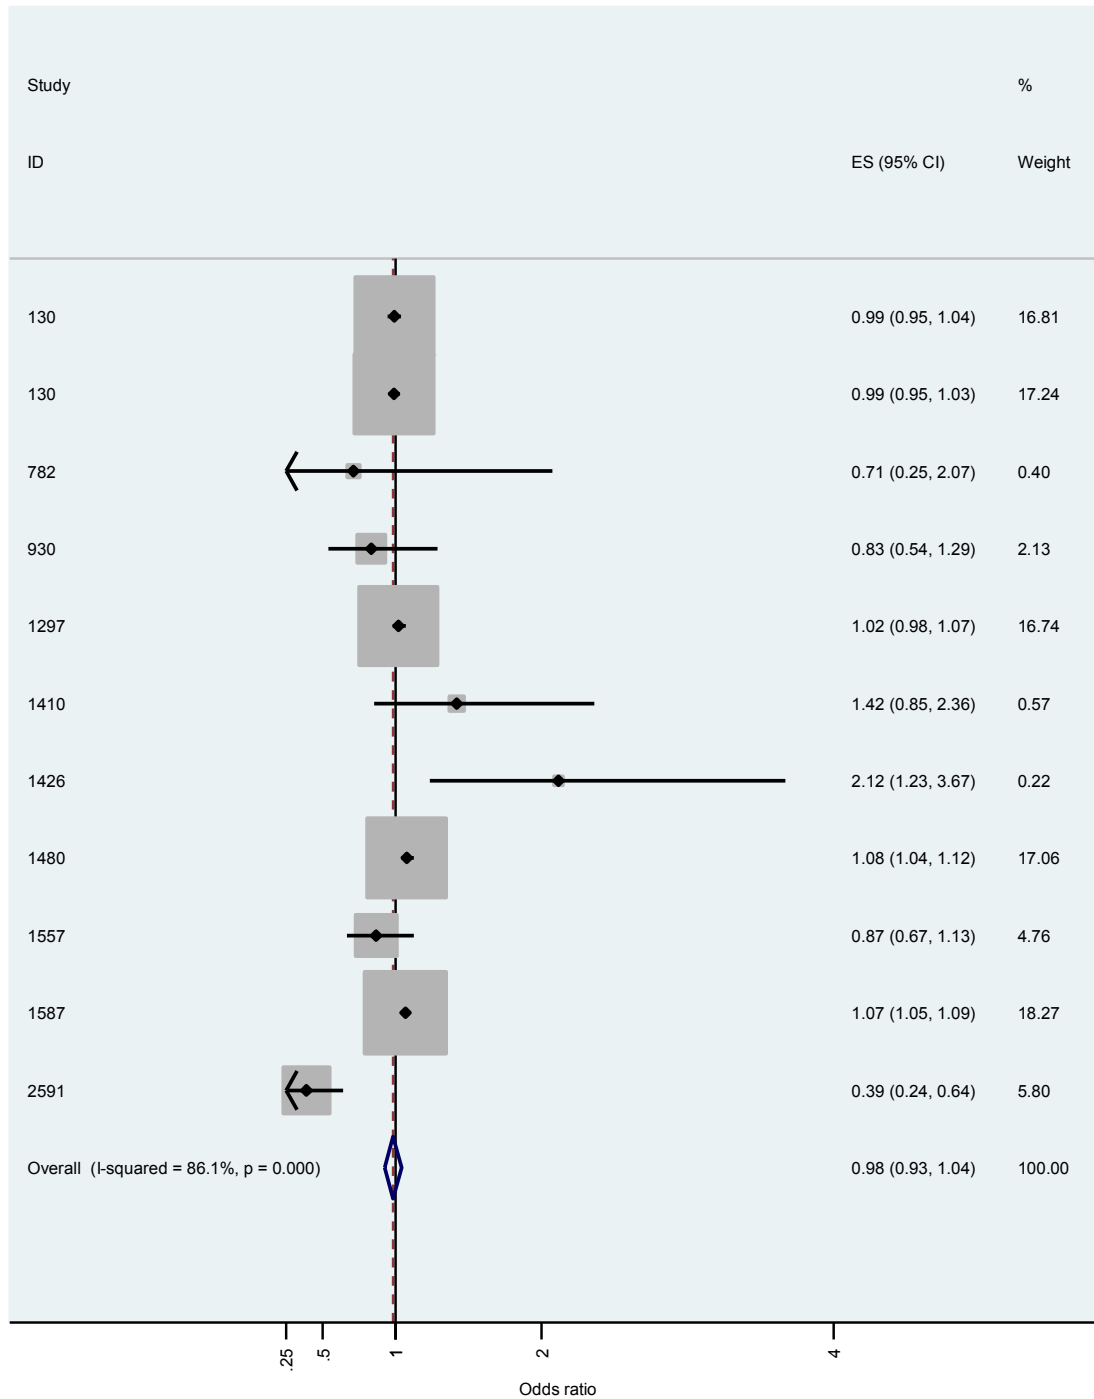

265

266 **Figure 4:** Forest plot of association between % carbohydrate intake of total energy and obesity

267 Publication bias: the p-values from the Egger test for publication bias by strata both suggested no significant publication bias (Strata one p-value=0.691; Strata two p-value=0.199). A visualisation based on funnel plots (Figure 5) confirmed a likely lack of potential publication bias.

269  
270  
271  
272  
273

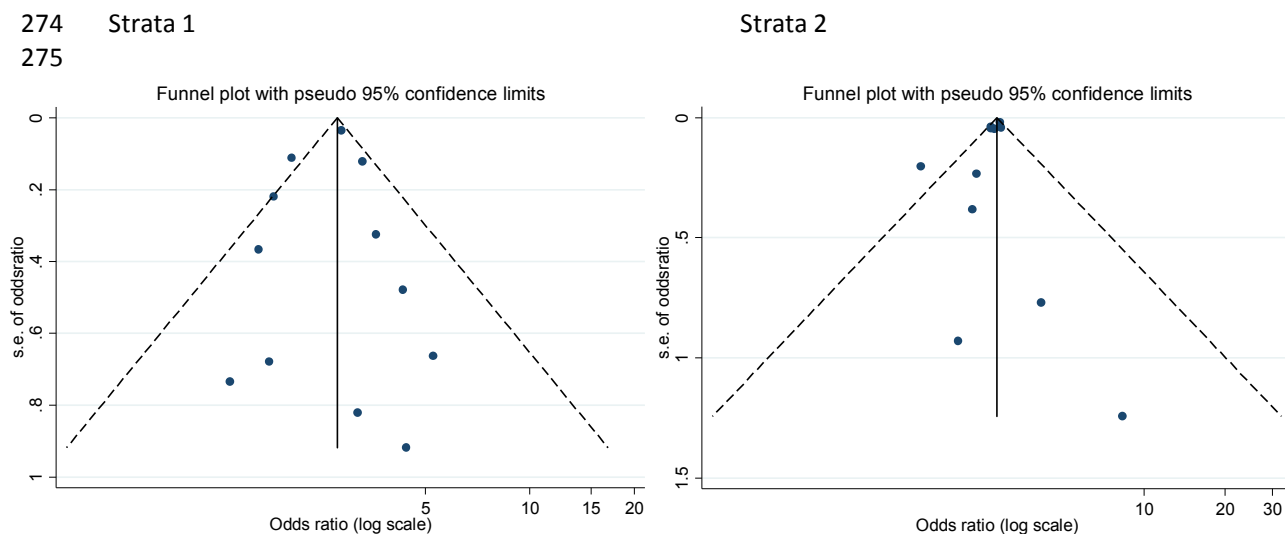

277 Figure 5: Funnel plots for assessment of publication bias by strata

## 278 Discussion

279 The literature, as well as the results of this study, suggest a conflicting association between the  
 280 proportions of energy consumed as carbohydrate and obesity propensity and reinforces the  
 281 dominance of the total energy intake/expenditure paradigm as the primary driver of body weight,  
 282 modulated by an interaction of genetic, environmental and psychosocial factors [6-8].

283 Notwithstanding the results of our systematic meta review that suggest no significant evidence of a  
 284 relationship between total carbohydrate intake and body weight, other studies have indicated that  
 285 dietary carbohydrates have been shown to be associated with weight gain [19] and specific  
 286 carbohydrates, like sugar sweetened beverages, are positively associated with weight gain and  
 287 obesity [11 20].

290 The results of a number of systematic reviews, investigating high versus low carbohydrate restricted  
 291 calorie diets, are interesting. In terms of achieving weight loss on a restricted calorie diet, both high  
 292 fat - low carbohydrate and low fat - high carbohydrate diets were equally effective albeit there were  
 293 differences in serum lipid profiles [21-23]. Low carbohydrate restricted calorie diets (high fat) have  
 294 shown that they induce at least the same level (or more) of weight loss than their low fat (high  
 295 carbohydrate) counterpart diets [1 24 25]. Low carbohydrate diets also substantially reduce body  
 296 weight, BMI, abdominal circumference, systolic and diastolic BP and triglycerides, as well as fasting  
 297 glucose, glycated haemoglobin (HbA1c), plasma insulin and plasma C-reactive protein, as well as  
 298 increasing HDL [26]. From a physiological perspective, low carbohydrate diets may decrease calorie  
 299 intake because they increase demands on protein and amino acid turnover for gluconeogenesis  
 300 which has a high energy cost. Alternatively, low carbohydrate diets may induce weight loss due to  
 301 reducing insulin concentrations, thus promoting free fatty acid mobilization from body fat storage  
 302 [27].

303 The linkage between carbohydrates and obesity continues to be an intense debate with no clear  
 304 resolution at this stage. A major issue that needs to be addressed is whether the opposing roles of  
 305 carbohydrates in disease is paralleled by their role in obesity. The good and bad role of refined  
 306 versus unrefined carbohydrates is well documented in disease [28]. Refined carbohydrates and  
 307 sugars have long been labelled as the cause of "saccharine disease" involving a wide variety of  
 308 vascular disorders [9], metabolic syndrome and type 2 diabetes [29], cardiovascular and kidney  
 309 disease [30]. Conversely, the protective role of unrefined carbohydrates is reflected in a reduction in  
 310 cardiovascular disease [28 31], certain cancers and ulcerative colitis [32]. Interestingly, a recent

1  
2  
3 311 projection of longevity in 35 industrialized countries reflects that carbohydrates are an integral  
4 312 aspect of the diets of the four leading countries [33-35]. The opposing roles of dietary carbohydrates  
5 313 and obesity is also supported in the literature that demonstrates bad carbohydrates (unrefined  
6 314 carbohydrates and sugar) promote obesity whilst unrefined carbohydrates may have the opposite  
7 315 effect [7 11 36]. However, the same evidence of good and bad carbohydrates in obesity is far from  
8 316 conclusive.

9 317  
10 318 Many limitations persist to establish whether there is a direct link between high carbohydrate intake  
11 319 and obesity. Firstly, the non-standard nature of dietary records used across different settings make it  
12 320 difficult to compare the results in a meta study [37 38]. This is further compounded by the type and  
13 321 nature of staple carbohydrates being consumed in different countries/population groups. A further  
14 322 factor involves multiple confounding influences that are nuanced across different populations as  
15 323 well as age, gender and ethnic groups [6 39 40].

16 324  
17 325 A further limitation of our study was the concentration of a few countries in the two strata. In the  
18 326 first stratum, the weighting of the pooled sample was largely made up of South Korean and United  
19 327 States data. In the second stratum, the pooled sample was influenced by a large sample resulting  
20 328 from multiple surveys of a multi-ethnic Hawaiian population. A further limitation was the  
21 329 heterogeneity across studies as evidenced by the large  $I^2$  statistics. This was potentially due to the  
22 330 heterogeneity in the classification of dietary intake across the studies.

## 331 332 **Conclusion**

333  
334 Based on our findings it cannot be concluded that a high carbohydrate diet or increased percentage  
335 of total energy intake in the form of carbohydrates increases the odds of being obese. Further  
336 studies are needed that specifically classify refined versus unrefined carbohydrate intake, as well as  
337 studies that investigate the relationship between high fat, high unrefined carbohydrates-sugar diets.

## 338 339 **Acknowledgements**

340 We would like to thank Professor Colleen Aldous and Professor Timothy Noakes for their input into  
341 the protocol which was designed for this study and previously published.

342  
343 This study was partly funded through the MRC South Africa (University of KwaZulu-Natal  
344 Gastrointestinal Cancer Research Centre [GICRC]). The funders had no role in study design, data  
345 collection and analysis, decision to publish, or preparation of the manuscript

## 346 347 **Author contributions**

348 KS, BS, TM, CS contributed to the conception and design of the systematic literature review, the  
349 collection and screening of publications. KS, BS contributed to the analysis and interpretation of the  
350 findings. KS, BS drafted the manuscript. TM, CS reviewed and provided input to revise the  
351 manuscript. All authors gave final approval for submission.

## 352 353 **Competing interests**

354 The author(s) declare that they have no competing interests.

## 355 356 **Funding**

357 Not applicable.

## 358 359 **Role of funder**

359 The funders had no role in study design, data collection and analysis, decision to publish, or  
360 preparation of the manuscript

## 361 References

- 362
- 363 1. Hu T, Mills KT, Yao L, et al. Effects of low-carbohydrate diets versus low-fat diets on metabolic risk  
364 factors: a meta-analysis of randomized controlled clinical trials. *American journal of*  
365 *epidemiology* 2012;**176**(suppl 7):S44-S54
- 366 2. Ng M, Fleming T, Robinson M, et al. Global, regional, and national prevalence of overweight and  
367 obesity in children and adults during 1980-2013: a systematic analysis for the Global Burden  
368 of Disease Study 2013. *Lancet* 2014;**384**(9945):766-81
- 369 3. Hill JO, Peters JC. Environmental contributions to the obesity epidemic. *Science*  
370 1998;**280**(5368):1371-74
- 371 4. Prentice AM, Jebb SA. Obesity in Britain: gluttony or sloth? *BMJ: British Medical Journal*  
372 1995;**311**(7002):437
- 373 5. Gluckman P, Nishtar S, Armstrong T. Ending childhood obesity: a multidimensional challenge. *The*  
374 *Lancet* 2015;**385**(9973):1048-50
- 375 6. Jebb SA. Aetiology of obesity. *British Medical Bulletin* 1997;**53**(2):264-85
- 376 7. Jebb SA. Dietary strategies for the prevention of obesity. *Proceedings of the Nutrition Society*  
377 2005;**64**(02):217-27
- 378 8. Jéquier E. Pathways to obesity. *International Journal of Obesity* 2002;**26**(S2):S12
- 379 9. Cleave TL. *The saccharine disease: conditions caused by the taking of refined carbohydrates, such*  
380 *as sugar and white flour*: Elsevier, 2013.
- 381 10. Added fructose: a principal driver of type 2 diabetes mellitus and its consequences. *Mayo Clinic*  
382 *Proceedings*; 2015. Elsevier.
- 383 11. Jebb SA. Carbohydrates and obesity: from evidence to policy in the UK. *Proceedings of the*  
384 *Nutrition Society* 2014:1-6
- 385 12. Sartorius B, Sartorius K, Aldous C, et al. Carbohydrate intake, obesity, metabolic syndrome and  
386 cancer risk? A two-part systematic review and meta-analysis protocol to estimate  
387 attributability. *BMJ open* 2016;**6**(1):e009301
- 388 13. Hoy D, Brooks P, Woolf A, et al. Assessing risk of bias in prevalence studies: modification of an  
389 existing tool and evidence of interrater agreement. *Journal of clinical epidemiology*  
390 2012;**65**(9):934-39
- 391 14. Von Elm E, Altman DG, Egger M, et al. The Strengthening the Reporting of Observational Studies  
392 in Epidemiology (STROBE) statement: guidelines for reporting observational studies.  
393 *Preventive medicine* 2007;**45**(4):247-51
- 394 15. Guyatt GH, Oxman AD, Santesso N, et al. GRADE guidelines: 12. Preparing Summary of Findings  
395 tables—binary outcomes. *J. Clin. Epidemiol.* 2013;**66**(2):158-72
- 396 16. Guyatt GH, Thorlund K, Oxman AD, et al. GRADE guidelines: 13. Preparing Summary of Findings  
397 tables and evidence profiles—continuous outcomes. *J. Clin. Epidemiol.* 2013;**66**(2):173-83
- 398 17. Egger M, Smith GD, Schneider M, et al. Bias in meta-analysis detected by a simple, graphical test.  
399 *BMJ* 1997;**315**(7109):629-34
- 400 18. Duval S, Tweedie R. Trim and fill: a simple funnel-plot-based method of testing and adjusting for  
401 publication bias in meta-analysis. *Biometrics* 2000;**56**(2):455-63
- 402 19. Ma Y, Olendzki B, Chiriboga D, et al. Association between dietary carbohydrates and body  
403 weight. *American journal of epidemiology* 2005;**161**(4):359-67
- 404 20. Malik VS, Schulze MB, Hu FB. Intake of sugar-sweetened beverages and weight gain: a systematic  
405 review. *The American journal of clinical nutrition* 2006;**84**(2):274-88
- 406 21. Fagerberg B, Andersson O, Nilsson U, et al. Weight-reducing diets: role of carbohydrates on  
407 sympathetic nervous activity and hypotensive response. *International journal of obesity*  
408 1983;**8**(3):237-43



- 1  
2  
3 409 22. Foraker RE, Pennell M, Sprangers P, et al. Effect of a low-fat or low-carbohydrate weight-loss diet  
4 410 on markers of cardiovascular risk among premenopausal women: A randomized trial. *Journal*  
5 411 *of Women's Health* 2014;**23**(8):675-80  
6 412 23. Noakes M, Keogh JB, Foster PR, et al. Effect of an energy-restricted, high-protein, low-fat diet  
7 413 relative to a conventional high-carbohydrate, low-fat diet on weight loss, body composition,  
8 414 nutritional status, and markers of cardiovascular health in obese women. *The American*  
9 415 *journal of clinical nutrition* 2005;**81**(6):1298-306  
10 416 24. Nordmann AJ, Nordmann A, Briel M, et al. Effects of low-carbohydrate vs low-fat diets on weight  
11 417 loss and cardiovascular risk factors: a meta-analysis of randomized controlled trials. *Archives*  
12 418 *of Internal Medicine* 2006;**166**(3):285-93  
13 419 25. Hession M, Rolland C, Kulkarni U, et al. Systematic review of randomized controlled trials of low-  
14 420 carbohydrate vs. low-fat/low-calorie diets in the management of obesity and its  
15 421 comorbidities. *Obesity reviews* 2009;**10**(1):36-50  
16 422 26. Santos F, Esteves S, da Costa Pereira A, et al. Systematic review and meta-analysis of clinical trials  
17 423 of the effects of low carbohydrate diets on cardiovascular risk factors. *Obesity reviews*  
18 424 2012;**13**(11):1048-66  
19 425 27. Krieger JW, Sitren HS, Daniels MJ, et al. Effects of variation in protein and carbohydrate intake on  
20 426 body mass and composition during energy restriction: a meta-regression. *The American*  
21 427 *journal of clinical nutrition* 2006;**83**(2):260-74  
22 428 28. Mellen PB, Walsh TF, Herrington DM. Whole grain intake and cardiovascular disease: a meta-  
23 429 analysis. *Nutrition, Metabolism and Cardiovascular Diseases* 2008;**18**(4):283-90  
24 430 29. Malik VS, Popkin BM, Bray GA, et al. Sugar-sweetened beverages and risk of metabolic syndrome  
25 431 and type 2 diabetes. *Diabetes care* 2010;**33**(11):2477-83  
26 432 30. Johnson RJ, Segal MS, Sautin Y, et al. Potential role of sugar (fructose) in the epidemic of  
27 433 hypertension, obesity and the metabolic syndrome, diabetes, kidney disease, and  
28 434 cardiovascular disease. *The American journal of clinical nutrition* 2007;**86**(4):899-906  
29 435 31. Burkitt DP, Walker A, Painter NS. Effect of dietary fibre on stools and transit-times, and its role in  
30 436 the causation of disease. *The Lancet* 1972;**300**(7792):1408-11  
31 437 32. Topping D. Cereal complex carbohydrates and their contribution to human health. *Journal of*  
32 438 *Cereal Science* 2007;**46**(3):220-29  
33 439 33. Kontis V, Bennett JE, Mathers CD, et al. Future life expectancy in 35 industrialised countries:  
34 440 projections with a Bayesian model ensemble. *The Lancet* 2017  
35 441 34. Poulain J-P. The contemporary diet in France: "de-structuration" or from commensalism to  
36 442 "vagabond feeding". *Appetite* 2002;**39**(1):43-55  
37 443 35. Kim SH, Kim MS, Lee MS, et al. Korean diet: characteristics and historical background. *Journal of*  
38 444 *Ethnic Foods* 2016;**3**(1):26-31  
39 445 36. Aller EE, Abete I, Astrup A, et al. Starches, sugars and obesity. *Nutrients* 2011;**3**(3):341-69  
40 446 37. SEMPOS CT, JOHNSON NE, SMITH EL, et al. Effects of intraindividual and interindividual variation  
41 447 in repeated dietary records. *American Journal of Epidemiology* 1985;**121**(1):120-30  
42 448 38. Bingham S, Gill C, Welch A, et al. Comparison of dietary assessment methods in nutritional  
43 449 epidemiology: weighed records v. 24 h recalls, food-frequency questionnaires and  
44 450 estimated-diet records. *British Journal of Nutrition* 1994;**72**(04):619-43  
45 451 39. Ehrenberg HM, Mercer BM, Catalano PM. The influence of obesity and diabetes on the  
46 452 prevalence of macrosomia. *American journal of obstetrics and gynecology* 2004;**191**(3):964-  
47 453 68  
48 454 40. Jebb SA, Moore MS. Contribution of a sedentary lifestyle and inactivity to the etiology of  
49 455 overweight and obesity: current evidence and research issues. *Medicine and science in*  
50 456 *sports and exercise* 1999;**31**(11 Suppl):S534-41  
51 457 41. Moher D, Liberati A, Tetzlaff J, et al. Preferred reporting items for systematic reviews and meta-  
52 458 analyses: the PRISMA statement. *International journal of surgery* 2010;**8**(5):336-41  
53  
54  
55  
56 459

460 **Appendix 1:** PRISMA (preferred reporting items for systematic review and meta-analysis) checklist  
 461 [41]

| Section/topic                      | #  | Checklist item                                                                                                                                                                                                                                                                                              | Reported on page # |
|------------------------------------|----|-------------------------------------------------------------------------------------------------------------------------------------------------------------------------------------------------------------------------------------------------------------------------------------------------------------|--------------------|
| <b>TITLE</b>                       |    |                                                                                                                                                                                                                                                                                                             |                    |
| Title                              | 1  | Identify the report as a systematic review, meta-analysis, or both.                                                                                                                                                                                                                                         | 1                  |
| <b>ABSTRACT</b>                    |    |                                                                                                                                                                                                                                                                                                             |                    |
| Structured summary                 | 2  | Provide a structured summary including, as applicable: background; objectives; data sources; study eligibility criteria, participants, and interventions; study appraisal and synthesis methods; results; limitations; conclusions and implications of key findings; systematic review registration number. | 2                  |
| <b>INTRODUCTION</b>                |    |                                                                                                                                                                                                                                                                                                             |                    |
| Rationale                          | 3  | Describe the rationale for the review in the context of what is already known.                                                                                                                                                                                                                              | 2-3                |
| Objectives                         | 4  | Provide an explicit statement of questions being addressed with reference to participants, interventions, comparisons, outcomes, and study design (PICOS).                                                                                                                                                  | 3                  |
| <b>METHODS</b>                     |    |                                                                                                                                                                                                                                                                                                             |                    |
| Protocol and registration          | 5  | Indicate if a review protocol exists, if and where it can be accessed (e.g., Web address), and, if available, provide registration information including registration number.                                                                                                                               | 2, 3               |
| Eligibility criteria               | 6  | Specify study characteristics (e.g., PICOS, length of follow-up) and report characteristics (e.g., years considered, language, publication status) used as criteria for eligibility, giving rationale.                                                                                                      | 4                  |
| Information sources                | 7  | Describe all information sources (e.g., databases with dates of coverage, contact with study authors to identify additional studies) in the search and date last searched.                                                                                                                                  | 3                  |
| Search                             | 8  | Present full electronic search strategy for at least one database, including any limits used, such that it could be repeated.                                                                                                                                                                               | 3                  |
| Study selection                    | 9  | State the process for selecting studies (i.e., screening, eligibility, included in systematic review, and, if applicable, included in the meta-analysis).                                                                                                                                                   | 4                  |
| Data collection process            | 10 | Describe method of data extraction from reports (e.g., piloted forms, independently, in duplicate) and any processes for obtaining and confirming data from investigators.                                                                                                                                  | 4-5                |
| Data items                         | 11 | List and define all variables for which data were sought (e.g., PICOS, funding sources) and any assumptions and simplifications made.                                                                                                                                                                       | 4-5                |
| Risk of bias in individual studies | 12 | Describe methods used for assessing risk of bias of individual studies (including specification of whether this was done at the study or outcome level), and how this information is to be used in any data synthesis.                                                                                      | 4                  |

|                      |    |                                                                                                                                                           |   |
|----------------------|----|-----------------------------------------------------------------------------------------------------------------------------------------------------------|---|
| Summary measures     | 13 | State the principal summary measures (e.g., risk ratio, difference in means).                                                                             | 5 |
| Synthesis of results | 14 | Describe the methods of handling data and combining results of studies, if done, including measures of consistency (e.g., $I^2$ ) for each meta-analysis. | 5 |

462

For peer review only

# BMJ Open

## Does high carbohydrate intake lead to increased risk of obesity? A systematic review and meta-analysis

|                                 |                                                                                                                                                                                                                                                                                                                                 |
|---------------------------------|---------------------------------------------------------------------------------------------------------------------------------------------------------------------------------------------------------------------------------------------------------------------------------------------------------------------------------|
| Journal:                        | <i>BMJ Open</i>                                                                                                                                                                                                                                                                                                                 |
| Manuscript ID                   | bmjopen-2017-018449.R1                                                                                                                                                                                                                                                                                                          |
| Article Type:                   | Research                                                                                                                                                                                                                                                                                                                        |
| Date Submitted by the Author:   | 04-Nov-2017                                                                                                                                                                                                                                                                                                                     |
| Complete List of Authors:       | Sartorius, Kurt; University of KwaZulu-Natal, Public Health Medicine, School of Nursing and Public Health<br>Sartorius, Benn; UKZN, School of Nursing and Public health<br>Madiba, Thandinkosi; University of KwaZulu-Natal, School of Clinical Medicine<br>Stefan, Cristina; African Medical Research and Innovation Institute |
| <b>Primary Subject Heading</b>: | Public health                                                                                                                                                                                                                                                                                                                   |
| Secondary Subject Heading:      | Epidemiology                                                                                                                                                                                                                                                                                                                    |
| Keywords:                       | high carbohydrate intake, obesity, observational                                                                                                                                                                                                                                                                                |
|                                 |                                                                                                                                                                                                                                                                                                                                 |

SCHOLARONE™  
Manuscripts

**Title Page****Does high carbohydrate intake lead to increased risk of obesity? A systematic review and meta-analysis**

Sartorius K<sup>\*1-3</sup>, Sartorius B<sup>\*1,2</sup>, Madiba TE<sup>2,4</sup>, Stefan C<sup>5</sup>

1. Discipline of Public Health Medicine, School of Nursing and Public Health, University of KwaZulu-Natal, Durban, South Africa
2. University of KwaZulu-Natal Gastrointestinal Cancer Research Centre (GICRC)
3. Faculty of Commerce, University of the Witwatersrand, Johannesburg, South Africa
4. School of Clinical Medicine, University of KwaZulu-Natal, Durban, South Africa
5. African Medical Research and Innovation Institute, Cape Town, South Africa

\* Joint first authors

Correspondence to both:

Professor Kurt Sartorius; email: Kurt.Sartorius@wits.ac.za. Tel.: +27 (0) 11-717-8056; Fax.: +27 (0) 11-717-8223. Postal address: University of the Witwatersrand, Private Bag 3, 2050, Johannesburg, South Africa.

Professor Benn Sartorius; email: Sartorius@ukzn.ac.za; Tel.: +27 (0) 31-260-4459; Fax.: +27 (0) 31-260-4211; Postal address: Discipline of Public Health Medicine, 2nd floor George Campbell Building, Howard College Campus, University of KwaZulu-Natal, Durban, 4001, South Africa.

## Abstract

Objectives: The present study aimed to test the association between high versus low carbohydrate diets and obesity, and secondly, to test the link between total carbohydrate intake (as a percentage of total energy intake) and obesity.

Setting, participants and outcome measures: We sought MEDLINE, PubMed and google scholar for observation studies published between January 1990 and December 2016 assessing an association between obesity and high carbohydrate intake. Two independent reviewers selected candidate studies, extracted data and assessed study quality.

Results: The study identified 22 articles that fulfilled the inclusion and exclusion criteria and quantified an association between carbohydrate intake and obesity. The first pooled strata (high carbohydrate versus a low carbohydrate intake) suggested a weak increased risk of obesity. The second pooled strata (increasing percentage of total carbohydrate intake in daily diet) showed a weak decreased risk of obesity. Both these pooled strata estimates were however not statistically significant.

Conclusions: On the basis of the current study, it cannot be concluded that a high carbohydrate diet or increased percentage of total energy intake in the form of carbohydrates increases the odds of obesity. A central limitation of the study was the non-standard classification of dietary intake across the studies, as well as confounders like total energy intake, activity levels, age and gender. Further studies are needed that specifically classify refined versus unrefined carbohydrate intake, as well as studies that investigate the relationship between high fat, high unrefined carbohydrate-sugar diets.

**Registration number** PROSPERO CRD42015023257

**Keywords:** high carbohydrate intake, obesity, analytical, observational

### Strengths and limitations:

- Systematic review of observational studies across LMIC and HIC countries and first to explore this angle as far as we are aware.
- The scarcity of studies and/or data that either measured obesity risk versus total carbohydrate intake or alternatively measured obesity risk on the basis of a high versus low carbohydrate intake is a limitation.
- The non-standardized instruments for total dietary and total carbohydrate intake across studies is a further limitation.
- The heterogeneity in the classification of dietary carbohydrate and variation in staple carbohydrates is especially emphasized across different countries, developed versus developing scenarios and socio-economic changes over the last three decades.
- Studies with high heterogeneity and varying design and measurement quality may limit the quality of evidence from this study.

## Introduction

Global estimates in 2005 indicated 937 million people were overweight and 328 million were obese [1]. In 2010, an estimated 3.4 million deaths, 3.9% of years of life lost, and 3.8% of disability-adjusted life-years worldwide, were attributed to overweight and obesity [2]. The rate of change of obesity in this global study indicated significant increases in both men and women. In men the proportion of adults with a body mass index (BMI) of 25 or greater increased from 28.8% in 1980 to 36.9% in 2013 and for women increased from 29.8% to 38.0%. These increases occurred in both developed and developing countries. In addition, significant increases in obesity were also recorded among children and adolescents in developed countries that indicated 23.8% of boys were either overweight or

1  
2  
3 obese and 22.6% of girls. Overweight and obesity is also increasing in children and adolescents in  
4 developing countries and has risen from 8.1% in 1980 to 12.9% in 2013 for boys and from 8.4% to  
5 13.4% for girls [2]. The relationship between dietary intake, and specifically the role of  
6 carbohydrates and obesity at a population level, is also unclear.

7  
8 The etiology of obesity increasingly reflects excessive calorie intake matched with higher levels of  
9 sedentary activity that occur in the face of a worldwide urban migration. In this scenario, traditional  
10 diets are often replaced with low cost energy dense foodstuffs produced by the industrialized food  
11 [3-5]. Body weight is ultimately determined by the interaction of genetic, environmental and  
12 psychosocial factors acting through the physiological mediators of energy intake and energy  
13 expenditure [6-8]. Nevertheless, carbohydrates have been linked to disease for many decades [9]  
14 and more recently with an epidemic of type 2 diabetes [10]. Although there is no consistent  
15 evidence that carbohydrates have driven the current levels of global obesity, carbohydrates form a  
16 major component of most national diets [11].

17  
18 The objective of this systematic review/meta-analysis is to investigate the relationship between  
19 carbohydrate intake and obesity. More specifically, the first question is whether a high versus low  
20 carbohydrate diet is a risk factor for obesity and secondly, whether total carbohydrate intake is a risk  
21 factor related to obesity?  
22

## 23 24 **Materials and Methods**

### 25 26 *Registration of protocol with PROSPERO*

27  
28 In accordance with the guidelines, the systematic review protocol was registered with the  
29 International Prospective Register of Systematic Reviews (PROSPERO) on 8 June 2015 (registration  
30 number CRD42015023257). The protocol was also formally peer reviewed and published in BMJ  
31 Open. Carbohydrate intake, obesity, metabolic syndrome and cancer risk? A two-part systematic  
32 review and meta-analysis protocol to estimate attributability [12].  
33

34  
35 This systematic review was aligned to the Preferred Reporting Items for Systematic Reviews and  
36 Meta-Analyses (PRISMA) guidelines to ensure all necessary steps have been followed (see  
37 Supplementary Table 1).  
38

### 39 40 *Data sources and searches*

41  
42 We used MEDLINE/PubMed and google scholar to identify suitable studies that evaluated the  
43 determinants of obesity including the effect of high versus low carbohydrate diets, as well as the  
44 percentage of carbohydrates in total dietary intake. Studies published between 1 January 1980 and  
45 31 December 2016 were included. In addition, web based studies that were unpublished (e.g.  
46 reports or unpublished theses) were evaluated using research engines like Google Scholar. The  
47 following keywords or medical subject headings on MEDLINE/PubMed and Google Scholar were  
48 used:

49 ("carbohydrate" OR "low carbohydrate" OR "low carb" OR "high carbohydrate" OR "high carb") AND  
50 ("composition" OR "diet" OR "dietary" OR "intake" OR "determinant") AND ("obesity" OR "obese")  
51 AND ("attributable" OR "odds" OR "risk" OR "hazard" OR "prevalence")

### 52 53 *Study screening and selection*

54  
55 We included studies examining healthy adults (18 years or older). We also included studies on  
56 people who were overweight or obese, but otherwise excluded (after evaluation) studies of  
57

1  
2  
3 populations restricted to specific diseases, conditions, or metabolic disorders. Of specific interest  
4 were general population studies that investigated the prevalence of obesity in relation to detailed  
5 dietary intake [11]. Studies quantifying dietary intake in terms of total carbohydrate intake as a  
6 percentage of total energy, and high vs low carbohydrate intake in relation to the odds of obesity,  
7 were included.

8  
9 Two authors (KS, BS) independently screened study titles and abstracts for potential eligibility.  
10 Screening questions were developed and pilot-tested with a subset of records before  
11 implementation. Full texts of potentially eligible studies were retrieved and the two authors  
12 independently applied inclusion/exclusion criteria to identify appropriate studies in this review.  
13 Disagreement was assessed using the Kappa statistic and was resolved through discussion and a  
14 third arbitrator. We developed a summary table with characteristics of included studies. Reasons for  
15 exclusion of studies were documented.

### 16 17 *Appraisal of the quality of included studies*

18  
19 Three reviewers (KS, CS, TM) were content experts and one reviewer was an experienced  
20 biostatistician and epidemiologist (BS). The contents experts only assessed potential publications  
21 with respect to the appropriateness of the research questions being tested. The biostatistician only  
22 evaluated the appropriateness of the individual study methods employed to ensure that an odds  
23 ratio was developed to assess the relationship between carbohydrate intake and the risk of obesity.

24  
25 (BS, KS) also evaluated studies for quality and bias using an adapted version of the Risk of Bias Tool  
26 for Prevalence Studies developed by Hoy et al [13]. The tool has 9 indicators to assess risk of bias  
27 which include the representativeness of sample, sampling frame, random selection, nonresponse  
28 bias, direct informant, and reliability/validity of the instrument(s). We dichotomised the quality  
29 appraisal for each item on the Hoy scale as “low risk” i.e. 0 or “high risk” i.e. 1. We further classified  
30 a response rate <80% with no assessment of responders vs non-responders as high risk in our  
31 assessment of the non-response indicator. If the selected text of the manuscript was unclear with  
32 regards to a specific indicator, when then assigned a high risk of bias. A study was considered to have  
33 a high overall risk of bias if  $\leq 3$  criteria were met, moderate risk of bias if 4 to 6 criteria were met, and  
34 low risk of bias if studies met 7 to 9 criteria. The detailed assessment of risk of bias for the selected  
35 22 studies are presented in Supplementary Table 2. Only one study was scored as having a high risk  
36 of bias, 7 scored a medium risk of bias and the majority (n=14) were scored as low risk of bias. The  
37 potential of non-response bias appeared high based on the 80% minimum response rate cut-off. The  
38 sampling frame and strategy were the next least fulfilled criteria based on the bias criteria indicators  
39 on the Hoy instrument (Figure 1).

### 40 41 42 43 **Inclusion and exclusion criteria**

44  
45 We included cross-sectional, case-control or cohort studies assessing risk factors for obesity  
46 including dietary carbohydrate intake (carbohydrate % intake of total energy and high vs low  
47 carbohydrate intake). Case series or case reports without controls were excluded. We excluded  
48 studies assessing restricted dietary interventions as our primary objective was to assess reported  
49 carbohydrate intake and measured obesity in normal diet. Studies not performed in human  
50 participants were excluded, as were studies lacking primary data and/or explicit method description.  
51 Studies with major ethical issues were also excluded. The classification of obesity was based on BMI  
52 or visceral obesity (waist circumference). We considered both published and unpublished studies.  
53 No language restriction was applied.



### *Data extraction and management*

Feedback was solicited from the research team regarding the draft list of data variables for extraction. Data extraction forms were developed and pilot-tested in Distiller SR. One person (BS) extracted all the information. A second person (KS) verified 20% of studies for general characteristics information and 100% of studies regarding outcome data. Disagreements were resolved by consensus or by a third team member. Information on the descriptive and quantitative characteristics of studies included the following: Publication details (e.g. year of publication, language, publication status), Characteristics of study (e.g. study design, methods, country, setting, sample size, number of centres [if applicable], duration of follow-up, source of funding), Characteristics of population (e.g. age, gender, ethnicity, co-interventions, information regarding respondent bias or representativeness of the included population), Details about the exposure (e.g. type of diet, percentage of total calories obtained from carbohydrate consumption, method of assessing carbohydrate consumption; type of educational or other interventions and description, type of professional delivering intervention). Following extraction of data we noted the need to stratify the studies in two exposure strata, namely:

- High vs low carbohydrate intake;
- Total Carbohydrate percentage intake of total energy.

### *Data synthesis/analysis*

Data were analyzed using a random-effect meta-analysis model and incorporating a restricted maximum-likelihood (REML) variance estimator. Effect measures were presented as odds ratios (OR) with 95% confidence intervals (CI). All analyses were performed using R software version 3.2.0 or later (R Core Team (2015). R: A language and environment for statistical computing. R Foundation for Statistical Computing, Vienna, Austria. URL <http://www.R-project.org/>). The following packages were of R software were utilized for the meta-analyses: 'meta' version 4.2-0 (General Package for Meta-Analysis) and 'metafor' version 1.9-7 (A comprehensive collection of functions for conducting meta-analyses in). Recent GRADE guidelines were utilized for preparing summary tables for the primary outcomes [14 15].

### *Heterogeneity*

We assessed statistical heterogeneity in our meta-analysis using the  $I^2$  statistic. If the  $I^2$  was greater than 50% we regarded this as substantial heterogeneity.

### *Publication bias*

We investigated publication bias using funnel plots and Egger's test [16]. In cases where asymmetry was present based on visual assessment, we performed exploratory analyses to investigate and adjust this using trim and/or fill analysis [17].

### *Sensitivity analysis*

To further identify potential sources of heterogeneity, we performed the following subgroup analysis by type of carbohydrate intake i.e. high vs low classification compared to carbohydrate % intake of total energy.

## **Results**

Of 2665 retrieved citations, 200 articles were selected following abstract screening, following which 22 articles met the inclusion criteria. Figure 2 shows our search and selection/exclusion process. There was high agreement between articles selected based on abstract screening between the two

1  
2  
3 reviewers (96.12% agreement between two independent raters, \*Kappa statistic = 0.633,  $p < 0.001$ ).  
4 Figure 3 shows that all but one of the eligible and selected articles were published since 2000. There  
5 were a few large studies in early 2000's, a decrease in sample size of studies in mid-2000 period and  
6 then increase in sample size from 2009.  
7

8 The odds ratios of becoming obese based on carbohydrate intake were tested using two strata of  
9 data (Table 1). Stratum one was based on high vs low classification of carbohydrate intake while  
10 stratum two assessed carbohydrate % intake of total energy. In stratum one, 13 adult based studies  
11 showed a non-significant pooled odds ratio of 1.043 (95%CI: 0.933-1.154) indicating a slight positive  
12 relationship between high carbohydrate intake and obesity (Figure 4). Within this stratum, eight  
13 studies showed an increased risk of obesity and five studies a reduced risk of obesity. Of the eight  
14 studies showing an increased risk, four Korean based studies, making up 51.92% of the total pooled  
15 sample, showed an increased risk of obesity related to high carbohydrate diets (id 420, 2616), a high  
16 carbohydrate rice based diet (1206) and a high carbohydrate refined grains based diet (2226). Two  
17 studies in the South Western United states showed contrasting odds in the risk of obesity across two  
18 ethnic groups. In these two studies, Hispanic females indicated a reduced risk of obesity in relation  
19 to a high carbohydrate diet, whereas white females indicated an increased risk of obesity. The  
20 highest odds of increased obesity were indicated in a Sri Lankan study involving high levels of  
21 inactivity, as well as a high carbohydrate intake.  
22

23  
24 In Stratum two, 11 adult based studies investigated the relationship between total calorie intake of  
25 carbohydrates and the odds of obesity. Six studies showed a reduced risk and five an increased risk  
26 (Figure 5), once more with a non-significant pooled odds ratio of 0.984 (95% CI: 0.926-1.042), in  
27 opposite direction to results observed for stratum one (Table 1). One study, involving multiple  
28 surveys of a multi-ethnic Hawaiian population (id 1480), making up 66% of the total pooled sample,  
29 indicated a 7.7% increased risk of obesity in response to a higher percentage of total carbohydrate  
30 intake. Conversely, the three US based National Health and Nutrition Examination Surveys  
31 (NHANES), making up 15.71 % of the total pooled sample indicated no increased risk (id 130, 130) or  
32 a reduced risk of obesity (id 2591).  
33

34 The results of the meta-analyses by strata both suggested prominent heterogeneity across individual  
35 studies (Stratum one  $I^2 = 85.4\%$ ; Stratum two  $I^2 = 86.1\%$ ). Possible reasons for this are discussed  
36 under the limitations section.  
37  
38  
39  
40  
41  
42  
43  
44  
45  
46  
47  
48  
49  
50  
51  
52  
53  
54  
55  
56  
57  
58  
59  
60

Table 1: Odds ratios (and log odds) for developing obesity as a result of high vs low carbohydrate diet (strata 1) or increasing carbohydrate intake percentage (strata 2)

| Strata | Id   | Study                                                                                                                                                                                                                                                                                             | Exposure measured                                                                  | Odds ratio | 95% CI |       | Log odds ratio | 95% CI |       | Sample size |
|--------|------|---------------------------------------------------------------------------------------------------------------------------------------------------------------------------------------------------------------------------------------------------------------------------------------------------|------------------------------------------------------------------------------------|------------|--------|-------|----------------|--------|-------|-------------|
| 1      | 27   | Ahluwalia N, Ferrières J, Dallongeville J, Simon C, Ducimetière P, Amouyel P, Arveiler D, Ruidavets JB. Association of macronutrient intake patterns with being overweight in a population-based random sample of men in France. Diabetes & metabolism. 2009 Apr 30;35(2):129-36.                 | Quartile 4 vs 1 (CHD per day)                                                      | 0.50       | 0.25   | 0.97  | -0.30          | -0.60  | -0.01 | 966         |
| 1      | 279  | Bowman SA, Spence JT. A comparison of low-carbohydrate vs. high-carbohydrate diets: energy restriction, nutrient quality and correlation to body mass index. Journal of the American College of Nutrition. 2002 Jun 1;21(3):268-74.                                                               | Above 55% calories (High) vs 0% to 30% calories (Very low)                         | 0.72       | 0.62   | 0.84  | -0.14          | -0.21  | -0.08 | 10014       |
| 1      | 420  | Choi J, Se-Young O, Lee D, Tak S, Hong M, Park SM, Cho B, Park M. Characteristics of diet patterns in metabolically obese, normal weight adults (Korean National Health and Nutrition Examination Survey III, 2005). Nutrition, Metabolism and Cardiovascular Diseases. 2012 Jul 31;22(7):567-74. | Quartile 4 vs 1                                                                    | 1.66       | 1.13   | 2.43  | 0.22           | 0.05   | 0.39  | 3050        |
| 1      | 1080 | Jackson M, Walker S, Cruickshank JK, Sharma S, Cade J, Mbanya JC, Younger N, Forrester TF, Wilks R. Diet and overweight and obesity in populations of African origin: Cameroon, Jamaica and the UK. Public health nutrition. 2007 Feb;10(2):122-30.                                               | Tertiale 3 vs 1 for CHD intake                                                     | 0.31       | 0.06   | 1.50  | -0.51          | -1.22  | 0.18  | 2842        |
| 1      | 1206 | Kim J, Jo I, Joung H. A rice-based traditional dietary pattern is associated with obesity in Korean adults. Journal of the Academy of Nutrition and Dietetics. 2012 Feb 29;112(2):246-53.                                                                                                         | Tertiale 3 vs 1 for white Rice and Kimchi                                          | 1.19       | 1.09   | 1.33  | 0.08           | 0.04   | 0.12  | 13618       |
| 1      | 1364 | Lin H, Bermudez OI, Tucker KL. Dietary patterns of Hispanic elders are associated with acculturation and obesity. The Journal of nutrition. 2003 Nov 1;133(11):3651-7.                                                                                                                            | Rice dietary pattern                                                               | 1.05       | 1.02   | 1.09  | 0.02           | 0.01   | 0.04  | 1030        |
| 1      | 1526 | Meng P, Jia L, Gao X, Liao Z, Wu M, Li S, Chen B. Overweight and obesity in Shanghai adults and their associations with dietary patterns. Wei sheng yan jiu= Journal of hygiene research. 2014 Jul;43(4):567-72.                                                                                  | Staple food and vegetables higher obesity (Q4 vs Q1 higher proportion carb intake) | 1.28       | 1.00   | 1.64  | 0.11           | 0.00   | 0.22  | 768         |
| 1      | 1532 | Merchant AT, Vatanparast H, Barlas S, Dehghan M, Shah SM, De Koning L, Steck SE. Carbohydrate intake and overweight and obesity among healthy adults. Journal of the American Dietetic Association. 2009 Jul 31;109(7):1165-72.                                                                   | Quartiles of carbohydrate intake compared to the lowest intake category (Q4 vs Q1) | 0.60       | 0.42   | 0.85  | -0.22          | -0.38  | -0.07 | 4451        |
| 1      | 1634 | Murtaugh, M. A., Herrick, J. S., Sweeney, C., Baumgartner, K. B., Guiliano, A. R., Byers, T., & Slattery, M. L. (2007). Diet composition and risk of overweight and obesity in women living in the southwestern United States. Journal of the American Dietetic Association, 107(8), 1311-1321    | High vs Low: Carbohydrate (% energy) - Non-Hispanic (White)                        | 1.48       | 0.83   | 2.63  | 0.17           | -0.08  | 0.42  | 1599        |
| 1      | 1634 | Murtaugh, M. A., Herrick, J. S., Sweeney, C., Baumgartner, K. B., Guiliano, A. R., Byers, T., & Slattery, M. L. (2007). Diet composition and risk of overweight and obesity in women living in the southwestern United States. Journal of the American Dietetic Association, 107(8), 1311-1321    | High vs Low: Carbohydrate (% energy) - Hispanic                                    | 0.57       | 0.21   | 1.54  | -0.24          | -0.68  | 0.19  | 871         |
| 1      | 1923 | Rathnayake KM, Roopasingam T, Dibley MJ. High carbohydrate diet and physical inactivity associated with central obesity among premenopausal housewives in Sri Lanka. BMC research notes. 2014 Aug 23;7(1):564.                                                                                    | Percent of energy from carbohydrate: high (>=70%)                                  | 6.26       | 2.11   | 18.57 | 0.80           | 0.32   | 1.27  | 100         |
| 1      | 2226 | Song, S., Lee, J. E., Song, W. O., Paik, H. Y., & Song, Y. (2014). Carbohydrate intake and refined-grain consumption are associated with metabolic syndrome in the                                                                                                                                | Energy from CHD (Q5 vs Q1)                                                         | 1.46       | 1.07   | 2.01  | 0.16           | 0.03   | 0.30  | 6845        |

|   |      |                                                                                                                                                                                                                                                                  |                                                              |      |          |      |       |       |       |        |  |
|---|------|------------------------------------------------------------------------------------------------------------------------------------------------------------------------------------------------------------------------------------------------------------------|--------------------------------------------------------------|------|----------|------|-------|-------|-------|--------|--|
|   |      | Korean adult population. Journal of the Academy of Nutrition and Dietetics, 114(1), 54-62                                                                                                                                                                        |                                                              |      |          |      |       |       |       |        |  |
| 1 | 2616 | Youn, S., Woo, H. D., Cho, Y. A., Shin, A., Chang, N., & Kim, J. (2012). Association between dietary carbohydrate, glycemic index, glycemic load, and the prevalence of obesity in Korean men and women. Nutrition research, 32(3), 153-159                      | Q4 vs Q1 carbohydrate intake                                 | 1.16 | 0.6<br>0 | 2.21 | 0.06  | -0.22 | 0.35  | 933    |  |
| 2 | 130  | Austin GL, Ogden LG, Hill JO. Trends in carbohydrate, fat, and protein intakes and association with energy intake in normal-weight, overweight, and obese individuals: 1971–2006. The American journal of clinical nutrition. 2011 Apr 1;93(4):836-43.           | Carbohydrate intake (% of energy)- NHANES I                  | 0.99 | 0.9<br>5 | 1.04 | 0.00  | -0.02 | 0.02  | 12276  |  |
| 2 | 130  | Austin GL, Ogden LG, Hill JO. Trends in carbohydrate, fat, and protein intakes and association with energy intake in normal-weight, overweight, and obese individuals: 1971–2006. The American journal of clinical nutrition. 2011 Apr 1;93(4):836-43.           | Carbohydrate intake (% of energy)- NHANES 2005/2006          | 0.99 | 0.9<br>5 | 1.03 | 0.00  | -0.02 | 0.01  | 4057   |  |
| 2 | 782  | Garaulet M, Marin C, Perez-Llamas F, Canteras M, Tebar FJ, Zamora S. Adiposity and dietary intake in cardiovascular risk in an obese population from a Mediterranean area. Journal of physiology and biochemistry. 2004 Mar 1;60(1):39-49.                       | Carbohydrate intake (% of energy)                            | 0.71 | 0.2<br>5 | 2.07 | -0.15 | -0.60 | 0.32  | 193    |  |
| 2 | 930  | Hartline-Grafton HL, Rose D, Johnson CC, Rice JC, Webber LS. Are school employees role models of healthful eating? Dietary intake results from the ACTION worksite wellness trial. Journal of the American Dietetic Association. 2009 Sep 30;109(9):1548-56.     | Carbohydrate intake (% of energy)                            | 0.83 | 0.5<br>4 | 1.29 | -0.08 | -0.27 | 0.11  | 373    |  |
| 2 | 1297 | Langlois K, Garriguet D, Findlay L. Diet composition and obesity among Canadian adults. Health Reports. 2009 Dec 1;20(4):11.                                                                                                                                     | Carbohydrate intake (% of energy)                            | 1.02 | 0.9<br>8 | 1.07 | 0.01  | -0.01 | 0.03  | 6454   |  |
| 2 | 1410 | Lyles III TE, Desmond R, Faulk LE, Henson S, Hubbert K, Heimbürger DC, Ard JD. Diet variety based on macronutrient intake and its relationship with body mass index. Medscape General Medicine. 2006;8(3):39.                                                    | Carbohydrate DVS                                             | 1.42 | 0.8<br>5 | 2.36 | 0.15  | -0.07 | 0.37  | 74     |  |
| 2 | 1426 | Ma Y, Olendzki B, Chiriboga D, Hebert JR, Li Y, Li W, Campbell M, Gendreau K, Ockene IS. Association between dietary carbohydrates and body weight. American journal of epidemiology. 2005 Feb 15;161(4):359-67.                                                 | Daily dietary glycemic index vs BMI continuous               | 2.12 | 1.2<br>3 | 3.67 | 0.33  | 0.09  | 0.56  | 641    |  |
| 2 | 1480 | Maskarinec G, Takata Y, Pagano I, Carlin L, Goodman MT, Marchand L, Nomura AM, Wilkens LR, Kolonel LN. Trends and dietary determinants of overweight and obesity in a multiethnic population. Obesity. 2006 Apr 1;14(4):717-26.                                  | Carbohydrate (1 g/100 kcal)                                  | 1.08 | 1.0<br>4 | 1.12 | 0.03  | 0.02  | 0.05  | 101699 |  |
| 2 | 1557 | Miller WC, Lindeman AK, Wallace J, Niederpruem M. Diet composition, energy intake, and exercise in relation to body fat in men and women. The American journal of clinical nutrition. 1990 Sep 1;52(3):426-30.                                                   | Lean vs obese subjects and energy derived from carbohydrates | 0.87 | 0.6<br>7 | 1.13 | -0.06 | -0.18 | 0.05  | 216    |  |
| 2 | 1587 | Mokhtar N, Elati J, Chabir R, Bour A, Elkari K, Schlossman NP, Caballero B, Aguenou H. Diet culture and obesity in northern Africa. The Journal of nutrition. 2001 Mar 1;131(3):887S-92S.                                                                        | Carbohydrate mean daily energy intake                        | 1.07 | 1.0<br>5 | 1.09 | 0.03  | 0.02  | 0.04  | 20080  |  |
| 2 | 2591 | Yang, E. J., Chung, H. K., Kim, W. Y., Kerver, J. M., & Song, W. O. (2003). Carbohydrate intake is associated with diet quality and risk factors for cardiovascular disease in US adults: NHANES III. Journal of the American College of Nutrition, 22(1), 71-79 | Carbohydrate intakes (% of energy)                           | 0.39 | 0.2<br>4 | 0.64 | -0.41 | -0.62 | -0.19 | 7828   |  |

1  
2  
3  
4 Publication bias: the p-values from the Egger test for publication bias by strata both suggested no  
5 significant publication bias (Strata one p-value=0.691; Strata two p-value=0.199). A visualisation  
6 based on funnel plots (Figure 6) confirmed a likely lack of potential publication bias.  
7

## 8 Discussion

9  
10 The results of this systematic review/meta-analysis study, suggest that a higher proportion of  
11 carbohydrates in unrestricted diets do not increase obesity levels. . Our paper, therefore, cannot  
12 contradict the assumption of the total energy intake/expenditure paradigm as the primary driver of  
13 body weight, modulated by an interaction of genetic, environmental and psychosocial factors [6-8].  
14 Other studies, however, have indicated that certain dietary carbohydrates, like sugar sweetened  
15 beverages, have been shown to be positively associated with weight gain [18] [11 19].  
16

17 The results of a number of systematic reviews, investigating high versus low carbohydrate restricted  
18 calorie diets, are interesting. In terms of achieving weight loss on a restricted calorie diet, both high  
19 fat - low carbohydrate and low fat - high carbohydrate diets were equally effective albeit there were  
20 differences in serum lipid profiles [20-22] . Low carbohydrate restricted calorie diets (high fat) have  
21 shown that they induce at least the same level (or more) of weight loss than their low fat (high  
22 carbohydrate) counterpart diets [1 23 24]. Low carbohydrate diets also substantially reduce body  
23 weight , BMI, abdominal circumference, systolic and diastolic BP and triglycerides, as well as fasting  
24 glucose, glycated haemoglobin (HbA1c), plasma insulin and plasma C-reactive protein, as well as  
25 increasing HDL [25]. From a physiological perspective, low carbohydrate diets may decrease calorie  
26 intake because they increase demands on protein and amino acid turnover for gluconeogenesis  
27 which has a high energy cost. Alternatively, low carbohydrate diets may induce weight loss due to  
28 reducing insulin concentrations, thus promoting free fatty acid mobilization from body fat storage  
29 [26]. Low carbohydrates diets are also related to weight loss because of increased levels of satiety  
30 thus positively re-enforcing reduced calorie intake [27 28].  
31

32 The linkage between carbohydrates and obesity continues to be an intense debate with no clear  
33 resolution at this stage. A major issue that needs to be addressed is whether the opposing roles of  
34 carbohydrates in disease is paralleled by their role in obesity. The good and bad role of refined  
35 versus unrefined carbohydrates is well documented in disease [29-31]. Refined carbohydrates and  
36 sugars have long been labelled as the cause of “saccharine disease” involving a wide variety of  
37 vascular disorders [9], metabolic syndrome and type 2 diabetes [32], cardiovascular and kidney  
38 disease [33]. Conversely, the protective role of unrefined carbohydrates is reflected in a ‘consistent,  
39 inverse association between dietary whole grains and the incidence of cardiovascular disease’ [29].  
40 In general, moreover, pooled meta-analyses have indicated a protective effect from the  
41 consumption of coarse grains [34 35]. Interestingly, a recent projection of longevity in 35  
42 industrialized countries reflects that carbohydrates are an integral aspect of the diets of the four  
43 leading countries [36-38]. The opposing roles of dietary carbohydrates and obesity is also supported  
44 in the literature that demonstrates bad carbohydrates (unrefined carbohydrates and sugar) promote  
45 obesity whilst unrefined carbohydrates may have the opposite effect [7 11 39]. However, the same  
46 evidence of good and bad carbohydrates in obesity is far from conclusive and the studies included in  
47 this paper provided insufficient evidence of the risk of obesity relating to different categories of  
48 carbohydrates as envisaged in our initial research protocol.  
49  
50

51 Many limitations persist to establish whether there is a direct link between high carbohydrate intake  
52 and obesity. Firstly, the non-standard nature of dietary records used across different settings make it  
53 difficult to compare the results in a meta study. In particular, the selected studies did not quantify  
54 different classes of carbohydrates [40 41]. . This is further complicated by significant changes in  
55 carbohydrate type and proportion in the same population groups over time [42]. Finally, multiple  
56  
57  
58  
59  
60

1  
2  
3 confounding influences are nuanced across different populations, as well as age, gender and  
4 different ethnic groups in the same population, as well as differences across the urban-rural divide  
5 [6 43 44].  
6

7 A further limitation of our study was the concentration of a few countries in the two strata and the  
8 recognition that different populations/sub-populations consume varying proportions of different  
9 categories of carbohydrates in their daily diet [45]. This limitation is further nuanced by the nutrition  
10 transition experienced in industrializing countries in which higher a proportion of carbohydrates  
11 consumed consist of refined carbohydrates and sugars [46]. In the first stratum, the weighting of the  
12 pooled sample was largely made up of South Korean and United States data. In the second stratum,  
13 the pooled sample was influenced by a large sample resulting from multiple surveys of a multi-ethnic  
14 Hawaiian population. A further limitation was the heterogeneity across studies as evidenced by the  
15 large  $I^2$  statistics. This was potentially due to the heterogeneity in the classification of dietary intake  
16 across the studies.  
17

## 18 **Conclusion**

19  
20 Based on our findings it cannot be concluded that a high carbohydrate diet, or increased percentage  
21 of total energy intake in the form of carbohydrates, increases the odds of being obese. Mounting  
22 evidence exists, however, to indicate that the obesity epidemic has occurred during the industrial  
23 food era that has promoted the increased intake of refined carbohydrates and sugars. Further  
24 studies are needed that specifically investigate obesity as a function of different carbohydrate  
25 groups including refined versus unrefined carbohydrate intake. In parallel, prospective studies are  
26 needed to ascertain the relationship between obesity and long term high fat, high unrefined  
27 carbohydrates-sugar diets. We, therefore, advise readers that the assumption that all carbohydrates  
28 are not linked to obesity, is potentially erroneous.  
29  
30

## 31 **Acknowledgements**

32 We would like to thank Professor Colleen Aldous and Professor Timothy Noakes for their input into  
33 the protocol which was designed for this study and previously published.  
34

35 This study was partly funded through the MRC South Africa (University of KwaZulu-Natal  
36 Gastrointestinal Cancer Research Centre [GICRC]). The funders had no role in study design, data  
37 collection and analysis, decision to publish, or preparation of the manuscript  
38  
39

## 40 **Author contributions**

41 KS, BS, TM, CS contributed to the conception and design of the systematic literature review, the  
42 collection and screening of publications. KS, BS contributed to the analysis and interpretation of the  
43 findings. KS, BS drafted the manuscript. TM, CS reviewed and provided input to revise the  
44 manuscript. All authors gave final approval for submission.  
45

## 46 **Competing interests**

47 The author(s) declare that they have no competing interests.  
48

## 49 **Funding**

50 Not applicable.  
51  
52

## 53 **Role of funder**

54  
55  
56  
57  
58  
59  
60

The funders had no role in study design, data collection and analysis, decision to publish, or preparation of the manuscript

### Data sharing statement

All meta-data utilized in this analysis are provided in Table 1. No additional data available.

### References

1. Hu T, Mills KT, Yao L, et al. Effects of low-carbohydrate diets versus low-fat diets on metabolic risk factors: a meta-analysis of randomized controlled clinical trials. *American journal of epidemiology* 2012;**176**(suppl 7):S44-S54
2. Ng M, Fleming T, Robinson M, et al. Global, regional, and national prevalence of overweight and obesity in children and adults during 1980-2013: a systematic analysis for the Global Burden of Disease Study 2013. *Lancet* 2014;**384**(9945):766-81
3. Hill JO, Peters JC. Environmental contributions to the obesity epidemic. *Science* 1998;**280**(5368):1371-74
4. Prentice AM, Jebb SA. Obesity in Britain: gluttony or sloth? *BMJ: British Medical Journal* 1995;**311**(7002):437
5. Gluckman P, Nishtar S, Armstrong T. Ending childhood obesity: a multidimensional challenge. *The Lancet* 2015;**385**(9973):1048-50
6. Jebb SA. Aetiology of obesity. *British Medical Bulletin* 1997;**53**(2):264-85
7. Jebb SA. Dietary strategies for the prevention of obesity. *Proceedings of the Nutrition Society* 2005;**64**(02):217-27
8. Jéquier E. Pathways to obesity. *International Journal of Obesity* 2002;**26**(S2):S12
9. Cleave TL. *The saccharine disease: conditions caused by the taking of refined carbohydrates, such as sugar and white flour*: Elsevier, 2013.
10. Added fructose: a principal driver of type 2 diabetes mellitus and its consequences. *Mayo Clinic Proceedings*; 2015. Elsevier.
11. Jebb SA. Carbohydrates and obesity: from evidence to policy in the UK. *Proceedings of the Nutrition Society* 2014:1-6
12. Sartorius B, Sartorius K, Aldous C, et al. Carbohydrate intake, obesity, metabolic syndrome and cancer risk? A two-part systematic review and meta-analysis protocol to estimate attributability. *BMJ open* 2016;**6**(1):e009301
13. Hoy D, Brooks P, Woolf A, et al. Assessing risk of bias in prevalence studies: modification of an existing tool and evidence of interrater agreement. *Journal of clinical epidemiology* 2012;**65**(9):934-39
14. Guyatt GH, Oxman AD, Santesso N, et al. GRADE guidelines: 12. Preparing Summary of Findings tables—binary outcomes. *J. Clin. Epidemiol.* 2013;**66**(2):158-72
15. Guyatt GH, Thorlund K, Oxman AD, et al. GRADE guidelines: 13. Preparing Summary of Findings tables and evidence profiles—continuous outcomes. *J. Clin. Epidemiol.* 2013;**66**(2):173-83
16. Egger M, Smith GD, Schneider M, et al. Bias in meta-analysis detected by a simple, graphical test. *BMJ* 1997;**315**(7109):629-34
17. Duval S, Tweedie R. Trim and fill: a simple funnel-plot-based method of testing and adjusting for publication bias in meta-analysis. *Biometrics* 2000;**56**(2):455-63
18. Ma Y, Olendzki B, Chiriboga D, et al. Association between dietary carbohydrates and body weight. *American journal of epidemiology* 2005;**161**(4):359-67
19. Malik VS, Schulze MB, Hu FB. Intake of sugar-sweetened beverages and weight gain: a systematic review. *The American journal of clinical nutrition* 2006;**84**(2):274-88
20. Fagerberg B, Andersson O, Nilsson U, et al. Weight-reducing diets: role of carbohydrates on sympathetic nervous activity and hypotensive response. *International journal of obesity* 1983;**8**(3):237-43

21. Foraker RE, Pennell M, Sprangers P, et al. Effect of a low-fat or low-carbohydrate weight-loss diet on markers of cardiovascular risk among premenopausal women: A randomized trial. *Journal of Women's Health* 2014;**23**(8):675-80
22. Noakes M, Keogh JB, Foster PR, et al. Effect of an energy-restricted, high-protein, low-fat diet relative to a conventional high-carbohydrate, low-fat diet on weight loss, body composition, nutritional status, and markers of cardiovascular health in obese women. *The American journal of clinical nutrition* 2005;**81**(6):1298-306
23. Nordmann AJ, Nordmann A, Briel M, et al. Effects of low-carbohydrate vs low-fat diets on weight loss and cardiovascular risk factors: a meta-analysis of randomized controlled trials. *Archives of Internal Medicine* 2006;**166**(3):285-93
24. Hession M, Rolland C, Kulkarni U, et al. Systematic review of randomized controlled trials of low-carbohydrate vs. low-fat/low-calorie diets in the management of obesity and its comorbidities. *Obesity reviews* 2009;**10**(1):36-50
25. Santos F, Esteves S, da Costa Pereira A, et al. Systematic review and meta-analysis of clinical trials of the effects of low carbohydrate diets on cardiovascular risk factors. *Obesity reviews* 2012;**13**(11):1048-66
26. Krieger JW, Sitren HS, Daniels MJ, et al. Effects of variation in protein and carbohydrate intake on body mass and composition during energy restriction: a meta-regression. *The American journal of clinical nutrition* 2006;**83**(2):260-74
27. Halton TL, Hu FB. The effects of high protein diets on thermogenesis, satiety and weight loss: a critical review. *Journal of the American College of Nutrition* 2004;**23**(5):373-85
28. Noakes TD, Windt J. Evidence that supports the prescription of low-carbohydrate high-fat diets: a narrative review. *Br J Sports Med* 2017;**51**(2):133-39
29. Mellen PB, Walsh TF, Herrington DM. Whole grain intake and cardiovascular disease: a meta-analysis. *Nutrition, Metabolism and Cardiovascular Diseases* 2008;**18**(4):283-90
30. Clar C, Al-Khudairy L, Loveman E, et al. Low glycaemic index diets for the prevention of cardiovascular disease. *The Cochrane Library* 2017
31. Kelly SA, Hartley L, Loveman E, et al. Whole grain cereals for the primary or secondary prevention of cardiovascular disease. *The Cochrane Library* 2017
32. Malik VS, Popkin BM, Bray GA, et al. Sugar-sweetened beverages and risk of metabolic syndrome and type 2 diabetes. *Diabetes care* 2010;**33**(11):2477-83
33. Johnson RJ, Segal MS, Sautin Y, et al. Potential role of sugar (fructose) in the epidemic of hypertension, obesity and the metabolic syndrome, diabetes, kidney disease, and cardiovascular disease. *The American journal of clinical nutrition* 2007;**86**(4):899-906
34. Fardet A, Boirie Y. Associations between food and beverage groups and major diet-related chronic diseases: an exhaustive review of pooled/meta-analyses and systematic reviews. *Nutrition reviews* 2014;**72**(12):741-62
35. Slavin JL, Jacobs D, Marquart L, et al. The role of whole grains in disease prevention. *Journal of the American Dietetic Association* 2001;**101**(7):780-85
36. Kontis V, Bennett JE, Mathers CD, et al. Future life expectancy in 35 industrialised countries: projections with a Bayesian model ensemble. *The Lancet* 2017
37. Poulain J-P. The contemporary diet in France: "de-structuration" or from commensalism to "vagabond feeding". *Appetite* 2002;**39**(1):43-55
38. Kim SH, Kim MS, Lee MS, et al. Korean diet: characteristics and historical background. *Journal of Ethnic Foods* 2016;**3**(1):26-31
39. Aller EE, Abete I, Astrup A, et al. Starches, sugars and obesity. *Nutrients* 2011;**3**(3):341-69
40. SEMPOS CT, JOHNSON NE, SMITH EL, et al. Effects of intraindividual and interindividual variation in repeated dietary records. *American Journal of Epidemiology* 1985;**121**(1):120-30
41. Bingham S, Gill C, Welch A, et al. Comparison of dietary assessment methods in nutritional epidemiology: weighed records v. 24 h recalls, food-frequency questionnaires and estimated-diet records. *British Journal of Nutrition* 1994;**72**(04):619-43



- 1  
2  
3 42. Popkin BM, Gordon-Larsen P. The nutrition transition: worldwide obesity dynamics and their  
4 determinants. *International journal of obesity* 2004;**28**:S2-S9  
5 43. Ehrenberg HM, Mercer BM, Catalano PM. The influence of obesity and diabetes on the  
6 prevalence of macrosomia. *American journal of obstetrics and gynecology* 2004;**191**(3):964-  
7 68  
8 44. Jebb SA, Moore MS. Contribution of a sedentary lifestyle and inactivity to the etiology of  
9 overweight and obesity: current evidence and research issues. *Medicine and science in*  
10 *sports and exercise* 1999;**31**(11 Suppl):S534-41  
11 45. Merchant AT, Anand SS, Kelemen LE, et al. Carbohydrate intake and HDL in a multiethnic  
12 population. *The American journal of clinical nutrition* 2007;**85**(1):225-30  
13 46. Drewnowski A, Popkin BM. The nutrition transition: new trends in the global diet. *Nutrition*  
14 *reviews* 1997;**55**(2):31-43  
15 47. Moher D, Liberati A, Tetzlaff J, et al. Preferred reporting items for systematic reviews and meta-  
16 analyses: the PRISMA statement. *International journal of surgery* 2010;**8**(5):336-41  
17  
18  
19  
20  
21  
22  
23  
24  
25  
26  
27  
28  
29  
30  
31  
32  
33  
34  
35  
36  
37  
38  
39  
40  
41  
42  
43  
44  
45  
46  
47  
48  
49  
50  
51  
52  
53  
54  
55  
56  
57  
58  
59  
60

### Figure legends

**Figure 1:** Risk of bias assessment of the 9 indicators comparing the Hoy et al [13] instrument [light grey=low risk, medium grey: moderate risk, black: high risk].

**Figure 2:** PRISMA flow diagram for study selection following search and selection/exclusion process

**Figure 3:** Study sample size by year (combined strata)

**Figure 4:** Forest plot of association (logs odds ratio) between high vs low carbohydrate intake and obesity

**Figure 5:** Forest plot of association (log odds ratio) between % carbohydrate intake of total energy and obesity

**Figure 6:** Funnel plots for assessment of publication bias by strata

### Supplementary Tables

**Supplementary Table 1:** PRISMA (preferred reporting items for systematic review and meta-analysis) checklist [47]

**Supplementary Table 2:** Risk of bias among eligible studies (n=22)

1  
2  
3  
4  
5  
6  
7  
8  
9  
10  
11  
12  
13  
14  
15  
16  
17  
18  
19  
20  
21  
22  
23  
24  
25  
26  
27  
28  
29  
30  
31  
32  
33  
34  
35  
36  
37  
38  
39  
40  
41  
42  
43  
44  
45  
46  
47  
48  
49  
50  
51  
52  
53  
54  
55  
56  
57  
58  
59  
60

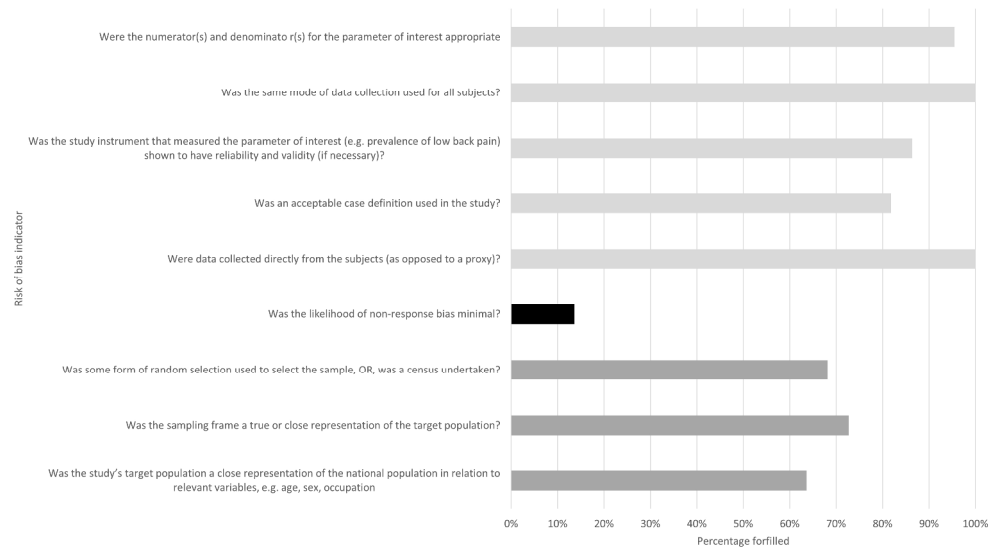

Figure 1: Risk of bias assessment of the 9 indicators comparing the Hoy et al [13] instrument [light grey=low risk, medium grey: moderate risk, black: high risk]

338x190mm (300 x 300 DPI)

Review only

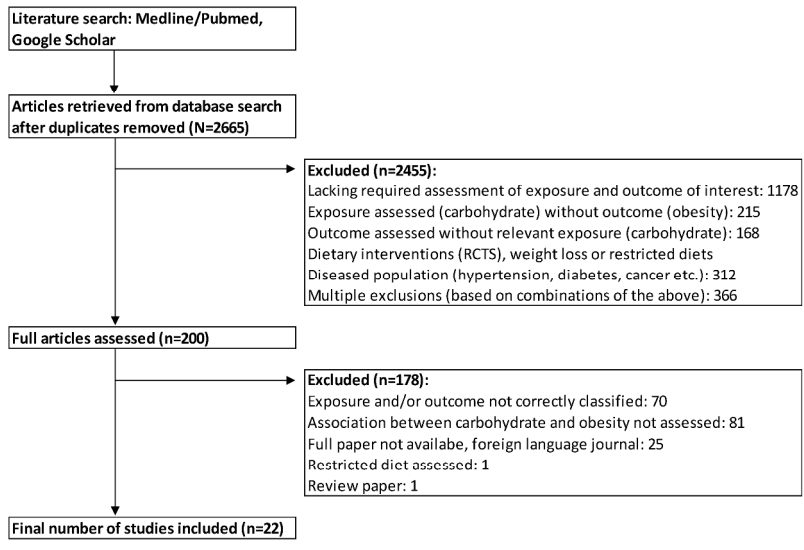

Figure 2: PRISMA flow diagram for study selection following search and selection/exclusion process

338x190mm (300 x 300 DPI)

Review only

1  
2  
3  
4  
5  
6  
7  
8  
9  
10  
11  
12  
13  
14  
15  
16  
17  
18  
19  
20  
21  
22  
23  
24  
25  
26  
27  
28  
29  
30  
31  
32  
33  
34  
35  
36  
37  
38  
39  
40  
41  
42  
43  
44  
45  
46  
47  
48  
49  
50  
51  
52  
53  
54  
55  
56  
57  
58  
59  
60

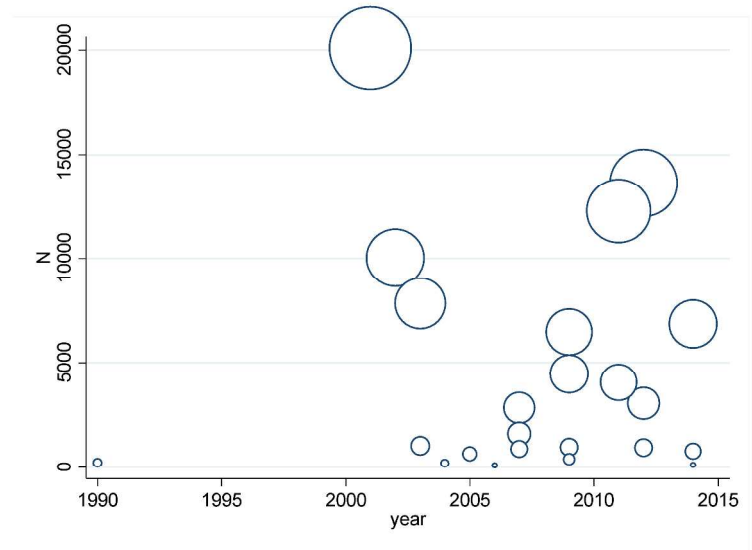

Figure 3: Study sample size by year (combined strata)

338x190mm (300 x 300 DPI)

review only

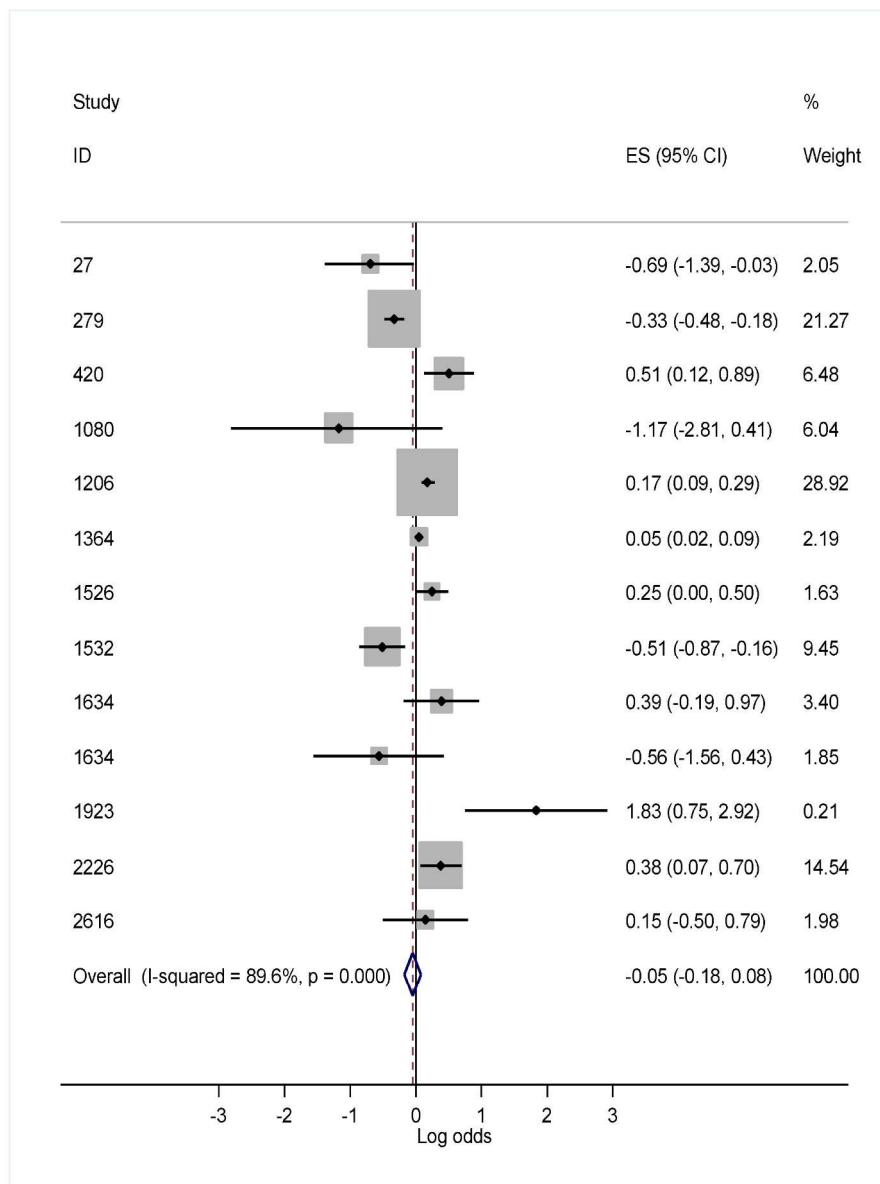

Figure 4: Forest plot of association (logs odds ratio) between high vs low carbohydrate intake and obesity

190x254mm (300 x 300 DPI)

1  
2  
3  
4  
5  
6  
7  
8  
9  
10  
11  
12  
13  
14  
15  
16  
17  
18  
19  
20  
21  
22  
23  
24  
25  
26  
27  
28  
29  
30  
31  
32  
33  
34  
35  
36  
37  
38  
39  
40  
41  
42  
43  
44  
45  
46  
47  
48  
49  
50  
51  
52  
53  
54  
55  
56  
57  
58  
59  
60

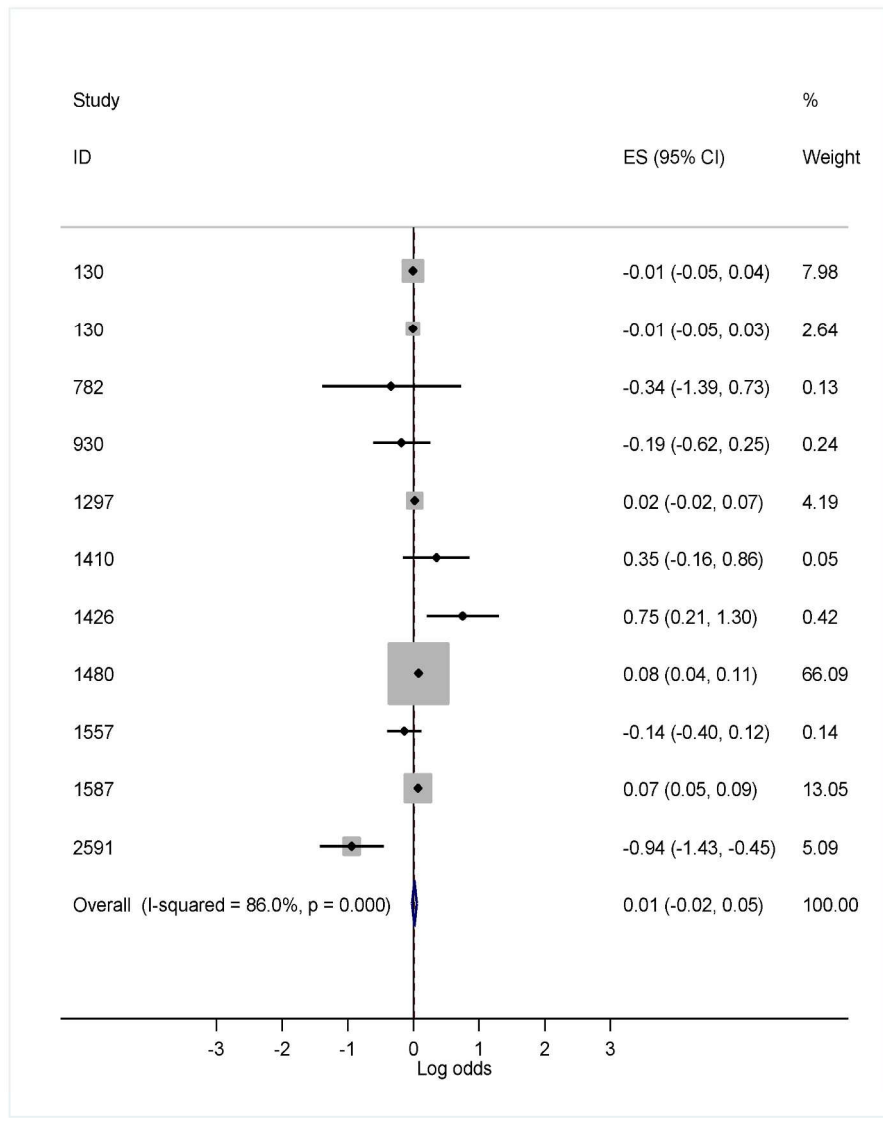

Figure 5: Forest plot of association (log odds ratio) between % carbohydrate intake of total energy and obesity

190x254mm (300 x 300 DPI)

1  
2  
3  
4  
5  
6  
7  
8  
9  
10  
11  
12  
13  
14  
15  
16  
17  
18  
19  
20  
21  
22  
23  
24  
25  
26  
27  
28  
29  
30  
31  
32  
33  
34  
35  
36  
37  
38  
39  
40  
41  
42  
43  
44  
45  
46  
47  
48  
49  
50  
51  
52  
53  
54  
55  
56  
57  
58  
59  
60

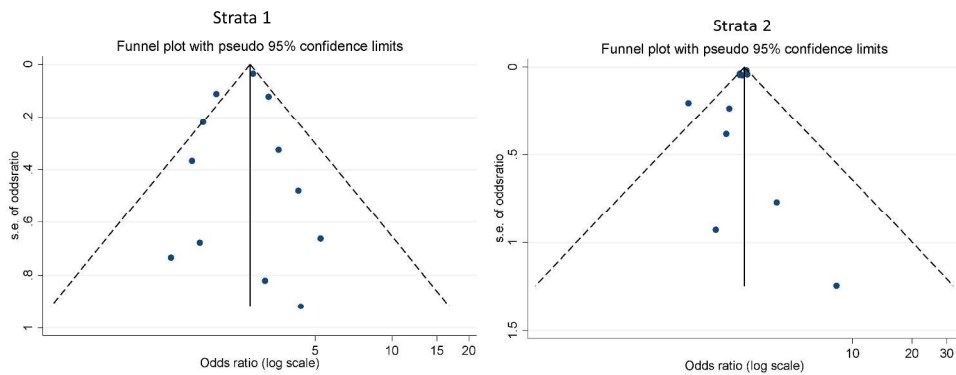

Figure 6: Funnel plots for assessment of publication bias by strata

338x190mm (300 x 300 DPI)

review only



**Supplementary Table 1:** PRISMA (preferred reporting items for systematic review and meta-analysis) checklist [47]

| Section/topic                      | #  | Checklist item                                                                                                                                                                                                                                                                                              | Reported on page # |
|------------------------------------|----|-------------------------------------------------------------------------------------------------------------------------------------------------------------------------------------------------------------------------------------------------------------------------------------------------------------|--------------------|
| <b>TITLE</b>                       |    |                                                                                                                                                                                                                                                                                                             |                    |
| Title                              | 1  | Identify the report as a systematic review, meta-analysis, or both.                                                                                                                                                                                                                                         | 1                  |
| <b>ABSTRACT</b>                    |    |                                                                                                                                                                                                                                                                                                             |                    |
| Structured summary                 | 2  | Provide a structured summary including, as applicable: background; objectives; data sources; study eligibility criteria, participants, and interventions; study appraisal and synthesis methods; results; limitations; conclusions and implications of key findings; systematic review registration number. | 2                  |
| <b>INTRODUCTION</b>                |    |                                                                                                                                                                                                                                                                                                             |                    |
| Rationale                          | 3  | Describe the rationale for the review in the context of what is already known.                                                                                                                                                                                                                              | 2-3                |
| Objectives                         | 4  | Provide an explicit statement of questions being addressed with reference to participants, interventions, comparisons, outcomes, and study design (PICOS).                                                                                                                                                  | 3                  |
| <b>METHODS</b>                     |    |                                                                                                                                                                                                                                                                                                             |                    |
| Protocol and registration          | 5  | Indicate if a review protocol exists, if and where it can be accessed (e.g., Web address), and, if available, provide registration information including registration number.                                                                                                                               | 2, 3               |
| Eligibility criteria               | 6  | Specify study characteristics (e.g., PICOS, length of follow-up) and report characteristics (e.g., years considered, language, publication status) used as criteria for eligibility, giving rationale.                                                                                                      | 4                  |
| Information sources                | 7  | Describe all information sources (e.g., databases with dates of coverage, contact with study authors to identify additional studies) in the search and date last searched.                                                                                                                                  | 3                  |
| Search                             | 8  | Present full electronic search strategy for at least one database, including any limits used, such that it could be repeated.                                                                                                                                                                               | 3                  |
| Study selection                    | 9  | State the process for selecting studies (i.e., screening, eligibility, included in systematic review, and, if applicable, included in the meta-analysis).                                                                                                                                                   | 4                  |
| Data collection process            | 10 | Describe method of data extraction from reports (e.g., piloted forms, independently, in duplicate) and any processes for obtaining and confirming data from investigators.                                                                                                                                  | 4-5                |
| Data items                         | 11 | List and define all variables for which data were sought (e.g., PICOS, funding sources) and any assumptions and simplifications made.                                                                                                                                                                       | 4-5                |
| Risk of bias in individual studies | 12 | Describe methods used for assessing risk of bias of individual studies (including specification of whether this was done at the study or outcome level), and how this information is to be used in any data synthesis.                                                                                      | 4                  |

|                      |    |                                                                                                                                                           |   |
|----------------------|----|-----------------------------------------------------------------------------------------------------------------------------------------------------------|---|
| Summary measures     | 13 | State the principal summary measures (e.g., risk ratio, difference in means).                                                                             | 5 |
| Synthesis of results | 14 | Describe the methods of handling data and combining results of studies, if done, including measures of consistency (e.g., $I^2$ ) for each meta-analysis. | 5 |

For peer review only

**Supplementary Table 2: Risk of bias among eligible studies (n=22)**

| <b>Hoy et al item*</b> |                                                                                                                                                                                                                                                                                                           |   |   |   |   |   |   |   |   |   |       |        |
|------------------------|-----------------------------------------------------------------------------------------------------------------------------------------------------------------------------------------------------------------------------------------------------------------------------------------------------------|---|---|---|---|---|---|---|---|---|-------|--------|
| No.                    | Study                                                                                                                                                                                                                                                                                                     | 1 | 2 | 3 | 4 | 5 | 6 | 7 | 8 | 9 | Total | 10     |
| 1                      | Ahluwalia N, Ferrières J, Dallongeville J, Simon C, Ducimetière P, Amouyel P, Arveiler D, Ruidavets JB. Association of macronutrient intake patterns with being overweight in a population-based random sample of men in France. <i>Diabetes &amp; metabolism</i> . 2009 Apr 30;35(2):129-36.             | 0 | 1 | 1 | 0 | 1 | 1 | 1 | 1 | 1 | 7     | Low    |
| 2                      | Austin GL, Ogden LG, Hill JO. Trends in carbohydrate, fat, and protein intakes and association with energy intake in normal-weight, overweight, and obese individuals: 1971–2006. <i>The American journal of clinical nutrition</i> . 2011 Apr 1;93(4):836-43.                                            | 1 | 1 | 1 | 0 | 1 | 1 | 1 | 1 | 1 | 8     | Low    |
| 3                      | Bowman SA, Spence JT. A comparison of low-carbohydrate vs. high-carbohydrate diets: energy restriction, nutrient quality and correlation to body mass index. <i>Journal of the American College of Nutrition</i> . 2002 Jun 1;21(3):268-74.                                                               | 1 | 1 | 1 | 0 | 1 | 0 | 0 | 1 | 1 | 6     | Medium |
| 4                      | Choi J, Se-Young O, Lee D, Tak S, Hong M, Park SM, Cho B, Park M. Characteristics of diet patterns in metabolically obese, normal weight adults (Korean National Health and Nutrition Examination Survey III, 2005). <i>Nutrition, Metabolism and Cardiovascular Diseases</i> . 2012 Jul 31;22(7):567-74. | 1 | 1 | 1 | 1 | 1 | 1 | 1 | 1 | 1 | 9     | Low    |
| 5                      | Garaulet M, Marin C, Perez-Llomas F, Canteras M, Tebar FJ, Zamora S. Adiposity and dietary intake in cardiovascular risk in an obese population from a Mediterranean area. <i>Journal of physiology and biochemistry</i> . 2004 Mar 1;60(1):39-49.                                                        | 0 | 0 | 0 | 0 | 1 | 0 | 1 | 1 | 0 | 3     | High   |
| 6                      | Hartline-Grafton HL, Rose D, Johnson CC, Rice JC, Webber LS. Are school employees role models of healthful eating? Dietary intake results from the ACTION worksite wellness trial. <i>Journal of the American Dietetic Association</i> . 2009 Sep 30;109(9):1548-56.                                      | 0 | 0 | 1 | 1 | 1 | 1 | 1 | 1 | 1 | 7     | Low    |
| 7                      | Jackson M, Walker S, Cruickshank JK, Sharma S, Cade J, Mbanya JC, Younger N, Forrester TF, Wilks R. Diet and overweight and obesity in populations of African origin: Cameroon, Jamaica and the UK. <i>Public health nutrition</i> . 2007 Feb;10(2):122-30.                                               | 1 | 1 | 1 | 0 | 1 | 1 | 1 | 1 | 1 | 8     | Low    |
| 8                      | Kim J, Jo I, Joung H. A rice-based traditional dietary pattern is associated with obesity in Korean adults. <i>Journal of the Academy of</i>                                                                                                                                                              | 1 | 1 | 1 | 0 | 1 | 1 | 1 | 1 | 1 | 8     | Low    |

|    |                                                                                                                                                                                                                                 |   |   |   |   |   |   |   |   |   |   |        |  |
|----|---------------------------------------------------------------------------------------------------------------------------------------------------------------------------------------------------------------------------------|---|---|---|---|---|---|---|---|---|---|--------|--|
|    | Nutrition and Dietetics. 2012 Feb 29;112(2):246-53.                                                                                                                                                                             |   |   |   |   |   |   |   |   |   |   |        |  |
| 9  | Langlois K, Garriguet D, Findlay L. Diet composition and obesity among Canadian adults. Health Reports. 2009 Dec 1;20(4):11.                                                                                                    | 1 | 1 | 1 | 0 | 1 | 1 | 1 | 1 | 1 | 8 | Low    |  |
| 10 | Lin H, Bermudez OI, Tucker KL. Dietary patterns of Hispanic elders are associated with acculturation and obesity. The Journal of nutrition. 2003 Nov 1;133(11):3651-7.                                                          | 0 | 1 | 0 | 0 | 1 | 1 | 1 | 1 | 1 | 6 | Medium |  |
| 11 | Lyles III TE, Desmond R, Faulk LE, Henson S, Hubbert K, Heimburger DC, Ard JD. Diet variety based on macronutrient intake and its relationship with body mass index. Medscape General Medicine. 2006;8(3):39.                   | 0 | 0 | 0 | 0 | 1 | 0 | 1 | 1 | 1 | 4 | Medium |  |
| 12 | Ma Y, Olendzki B, Chiriboga D, Hebert JR, Li Y, Li W, Campbell M, Gendreau K, Ockene IS. Association between dietary carbohydrates and body weight. American journal of epidemiology. 2005 Feb 15;161(4):359-67.                | 1 | 0 | 0 | 0 | 1 | 1 | 1 | 1 | 1 | 6 | Medium |  |
| 13 | Maskarinec G, Takata Y, Pagano I, Carlin L, Goodman MT, Marchand L, Nomura AM, Wilkens LR, Kolonel LN. Trends and dietary determinants of overweight and obesity in a multiethnic population. Obesity. 2006 Apr 1;14(4):717-26. | 1 | 1 | 1 | 1 | 1 | 1 | 1 | 1 | 1 | 9 | Low    |  |
| 14 | Meng P, Jia L, Gao X, Liao Z, Wu M, Li S, Chen B. Overweight and obesity in Shanghai adults and their associations with dietary patterns. Wei sheng yan jiu= Journal of hygiene research. 2014 Jul;43(4):567-72.                | 1 | 1 | 1 | 0 | 1 | 1 | 0 | 1 | 1 | 7 | Low    |  |
| 15 | Merchant AT, Vatanparast H, Barlas S, Dehghan M, Shah SM, De Koning L, Steck SE. Carbohydrate intake and overweight and obesity among healthy adults. Journal of the American Dietetic Association. 2009 Jul 31;109(7):1165-72. | 1 | 1 | 1 | 0 | 1 | 0 | 1 | 1 | 1 | 7 | Low    |  |
| 16 | Miller WC, Lindeman AK, Wallace J, Niederpruem M. Diet composition, energy intake, and exercise in relation to body fat in men and women. The American journal of clinical nutrition. 1990 Sep 1;52(3):426-30.                  | 1 | 0 | 0 | 0 | 1 | 1 | 1 | 1 | 1 | 6 | Medium |  |
| 17 | Mokhtar N, Elati J, Chabir R, Bour A, Elkari K, Schlossman NP, Caballero B, Aguenau H. Diet culture and obesity in northern Africa. The Journal of nutrition. 2001 Mar 1;131(3):887S-92S.                                       | 1 | 1 | 1 | 0 | 1 | 1 | 0 | 1 | 1 | 7 | Low    |  |
| 18 | Murtaugh, M. A., Herrick, J. S., Sweeney, C., Baumgartner, K. B., Guiliano, A. R., Byers, T., & Slattery, M. L. (2007). Diet composition and risk of overweight and obesity in women living in the southwestern United          | 0 | 1 | 1 | 0 | 1 | 1 | 1 | 1 | 1 | 7 | Low    |  |

|    |                                                                                                                                                                                                                                                                  |   |   |   |   |   |   |   |   |   |   |        |  |
|----|------------------------------------------------------------------------------------------------------------------------------------------------------------------------------------------------------------------------------------------------------------------|---|---|---|---|---|---|---|---|---|---|--------|--|
|    | States. Journal of the American Dietetic Association, 107(8), 1311-1321                                                                                                                                                                                          |   |   |   |   |   |   |   |   |   |   |        |  |
| 19 | Rathnayake KM, Roopasingam T, Dibley MJ. High carbohydrate diet and physical inactivity associated with central obesity among premenopausal housewives in Sri Lanka. BMC research notes. 2014 Aug 23;7(1):564.                                                   | 0 | 0 | 0 | 0 | 1 | 1 | 1 | 1 | 1 | 5 | Medium |  |
| 20 | Song, S., Lee, J. E., Song, W. O., Paik, H. Y., & Song, Y. (2014). Carbohydrate intake and refined-grain consumption are associated with metabolic syndrome in the Korean adult population. Journal of the Academy of Nutrition and Dietetics, 114(1), 54-62     | 1 | 1 | 1 | 0 | 1 | 1 | 1 | 1 | 1 | 8 | Low    |  |
| 21 | Yang, E. J., Chung, H. K., Kim, W. Y., Kerver, J. M., & Song, W. O. (2003). Carbohydrate intake is associated with diet quality and risk factors for cardiovascular disease in US adults: NHANES III. Journal of the American College of Nutrition, 22(1), 71-79 | 1 | 1 | 1 | 0 | 1 | 1 | 1 | 1 | 1 | 8 | Low    |  |
| 22 | Youn, S., Woo, H. D., Cho, Y. A., Shin, A., Chang, N., & Kim, J. (2012). Association between dietary carbohydrate, glycemic index, glycemic load, and the prevalence of obesity in Korean men and women. Nutrition research, 32(3), 153-159                      | 0 | 1 | 0 | 0 | 1 | 1 | 1 | 1 | 1 | 6 | Medium |  |

|    |                                                                                                                                                            |
|----|------------------------------------------------------------------------------------------------------------------------------------------------------------|
| *  | <b>Hoy et al item description</b>                                                                                                                          |
| 1  | Was the study's target population a close representation of the national population in relation to relevant variables, e.g. age, sex, occupation           |
| 2  | Was the sampling frame a true or close representation of the target population?                                                                            |
| 3  | Was some form of random selection used to select the sample, OR, was a census undertaken?                                                                  |
| 4  | Was the likelihood of non-response bias minimal?                                                                                                           |
| 5  | Were data collected directly from the subjects (as opposed to a proxy)?                                                                                    |
| 6  | Was an acceptable case definition used in the study?                                                                                                       |
| 7  | Was the study instrument that measured the parameter of interest (e.g. prevalence of low back pain) shown to have reliability and validity (if necessary)? |
| 8  | Was the same mode of data collection used for all subjects?                                                                                                |
| 9  | Were the numerator(s) and denominator(s) for the parameter of interest appropriate                                                                         |
| 10 | Summary on the overall risk of study bias (0-3: high, 4-6: moderate, 7-9: low)                                                                             |
